# Supplementary material for: Comparative Analysis of Type 1 and Type Z Protein Phosphatases Reveals D615 as a Key Residue for Ppz1 Regulation
Source: MDPI journal article supplement (doi:10.3390/ijms23031327), 2022-01-25

Figure S3.

Representative cross-linking scans.

Ppz1 and Hal3 were crosslinked with BS3 and analyzed by mass spectrometry as described in Materials and Methods.

Identified b-ions are shown as green, y-ions are shown as blue, purple peaks are fragment loss (denoted '\*' for NH<sub>3</sub> and 'o' for H<sub>2</sub>O), and light blue peaks represent internal fragments. Red peaks represent non-identified peaks. In the sequence lines, red 'K' are the cross-linked lysine residues and ':' shows preferred cleavage positions.

378 x 113

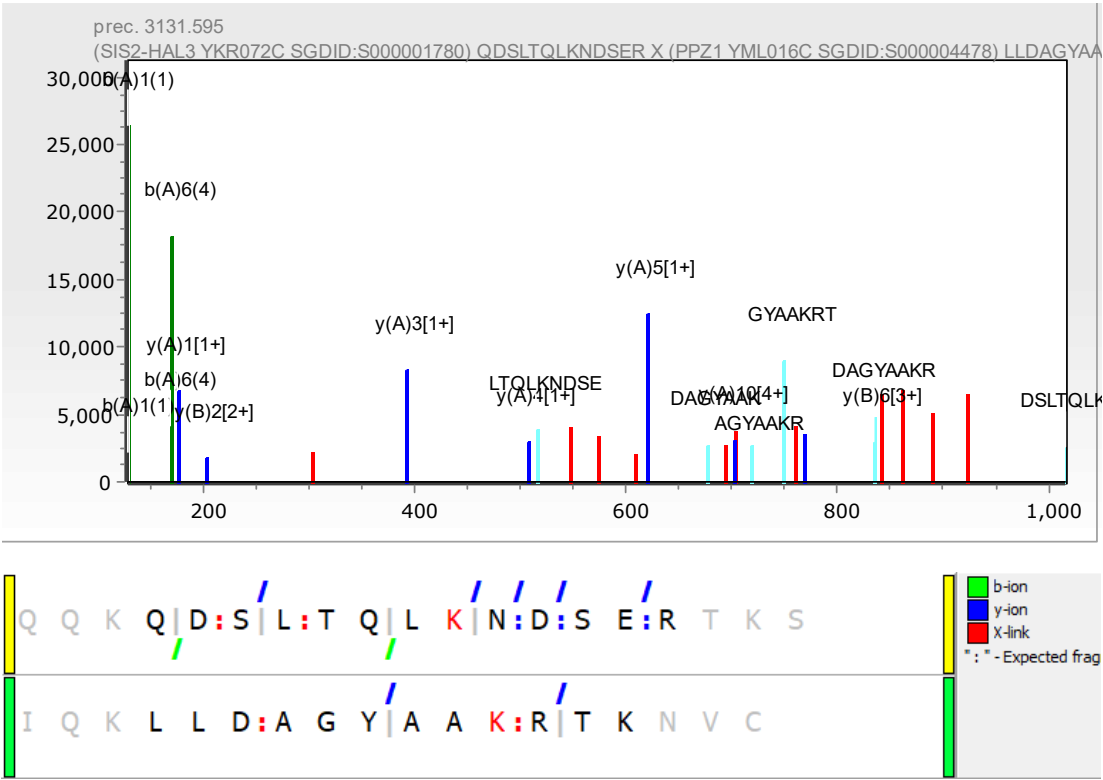

378 x 197

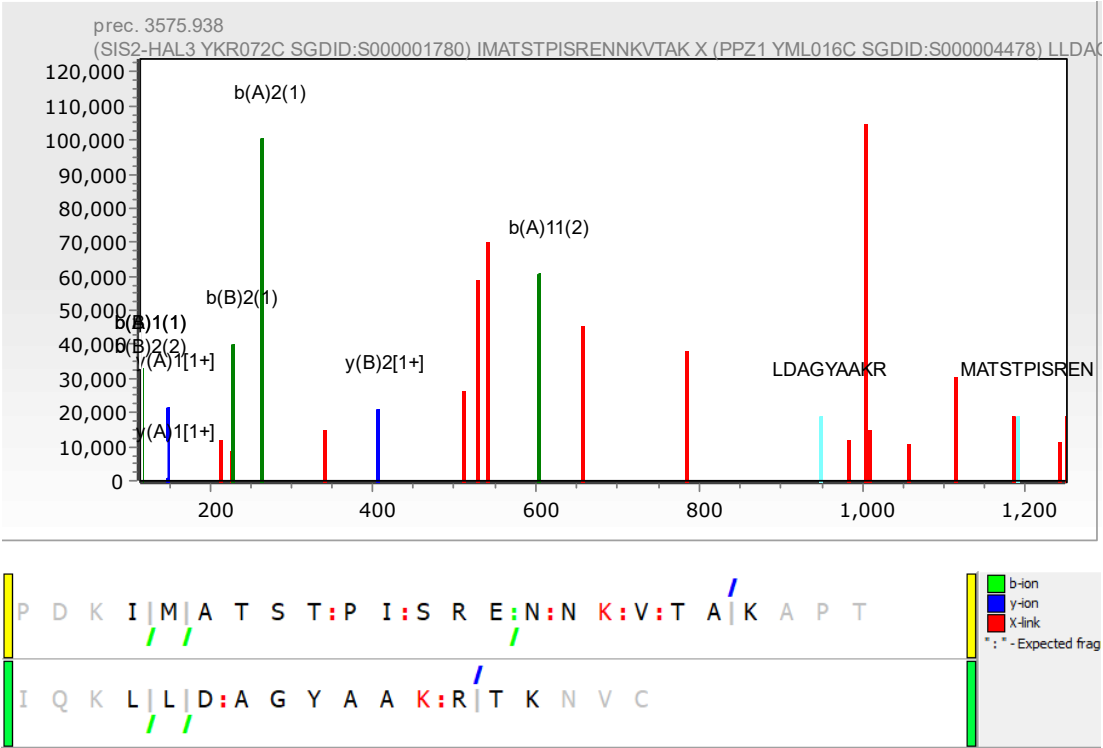

381x 210

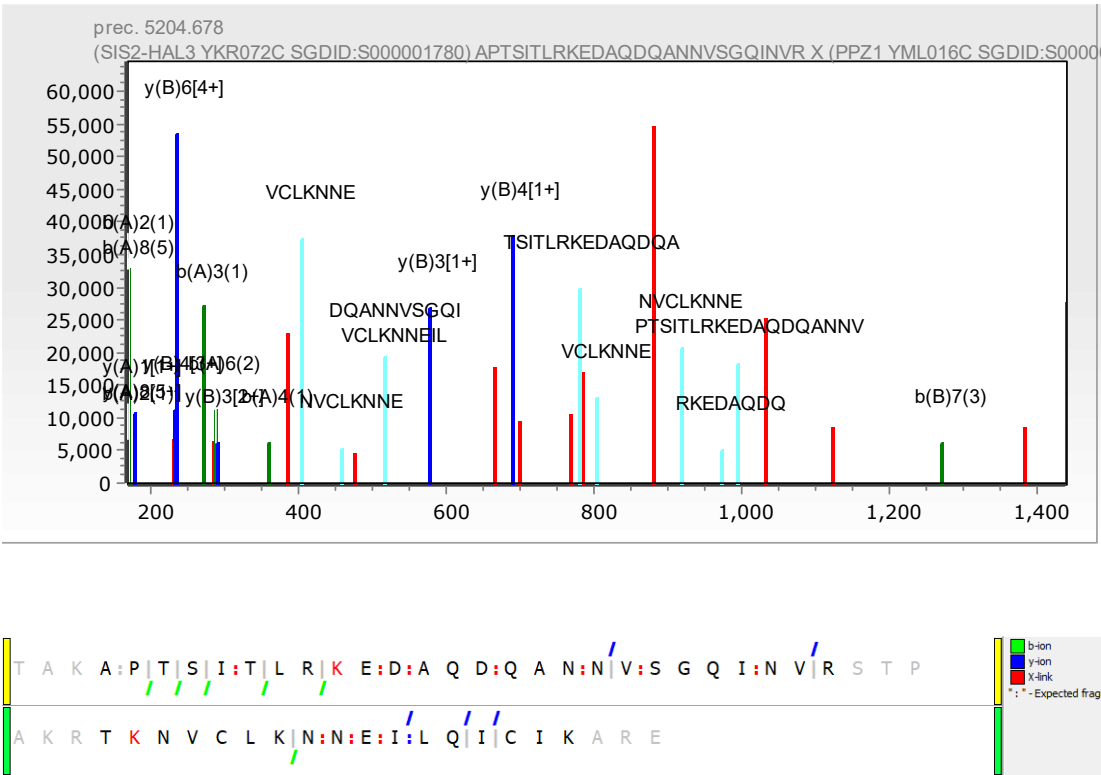

396x236

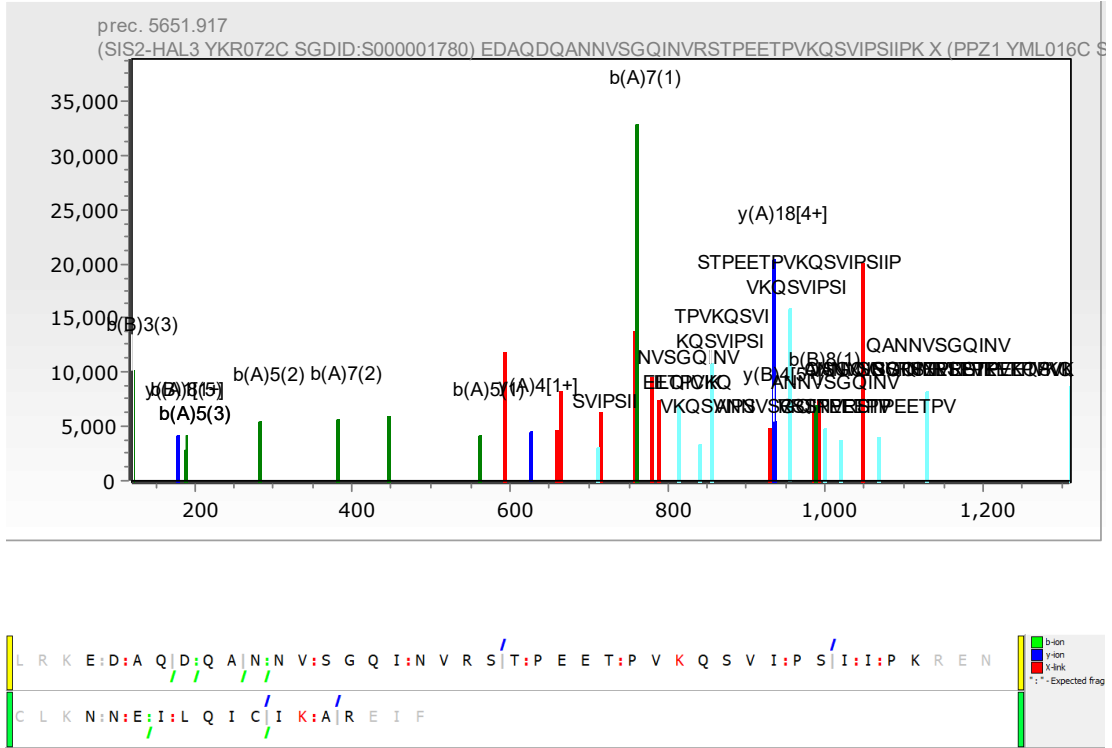

664 x 113

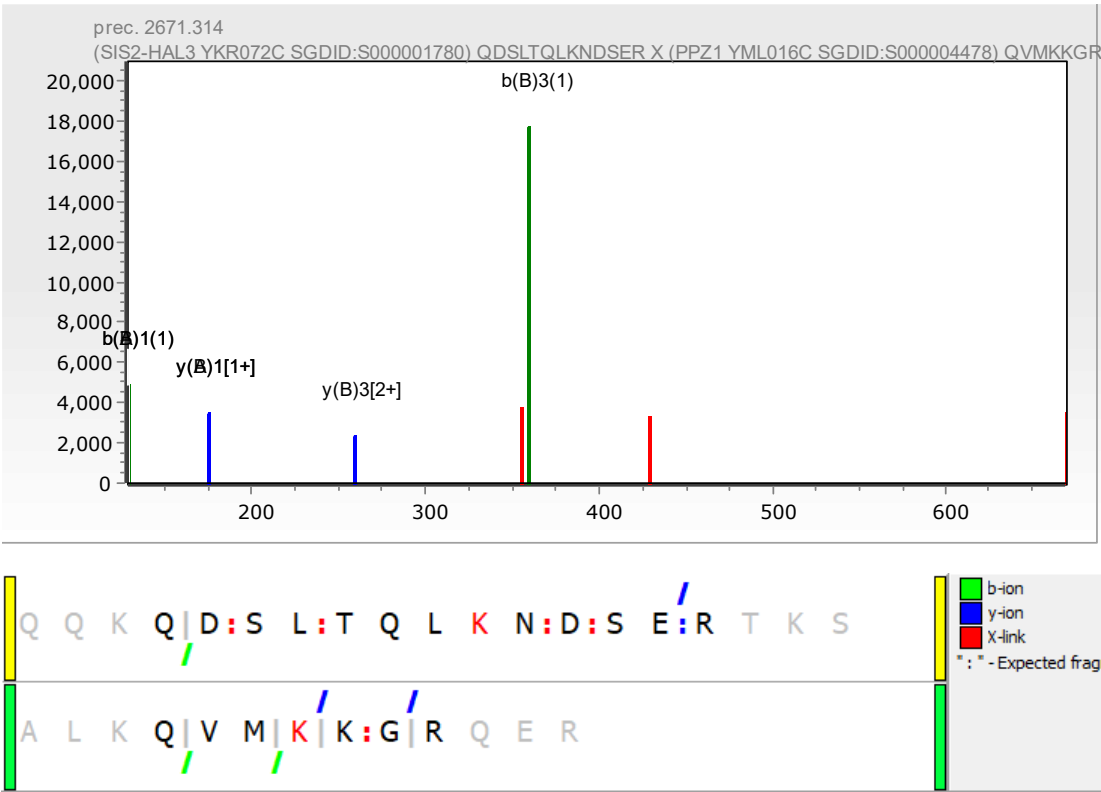

664x210

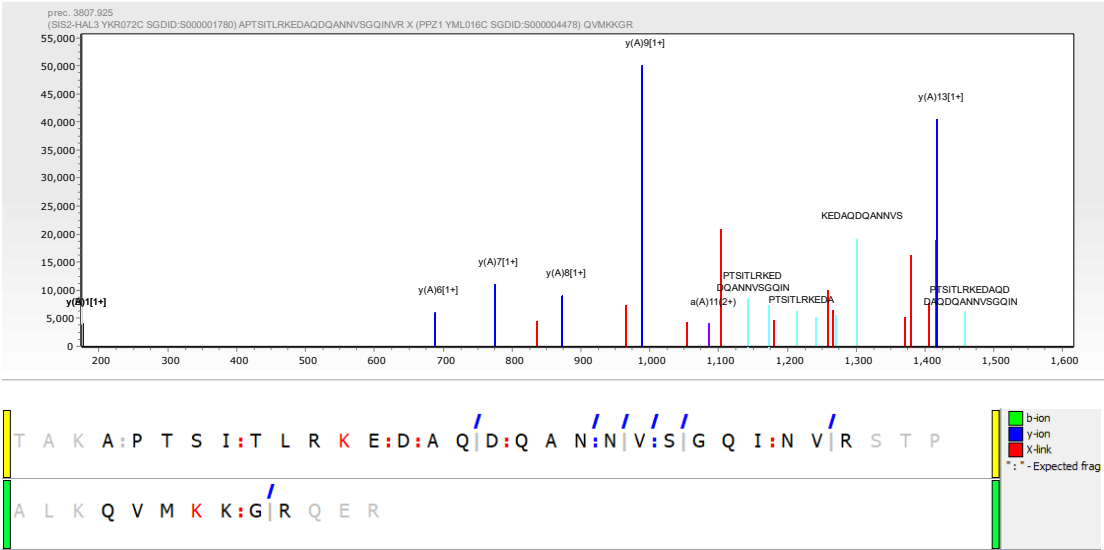

664x113

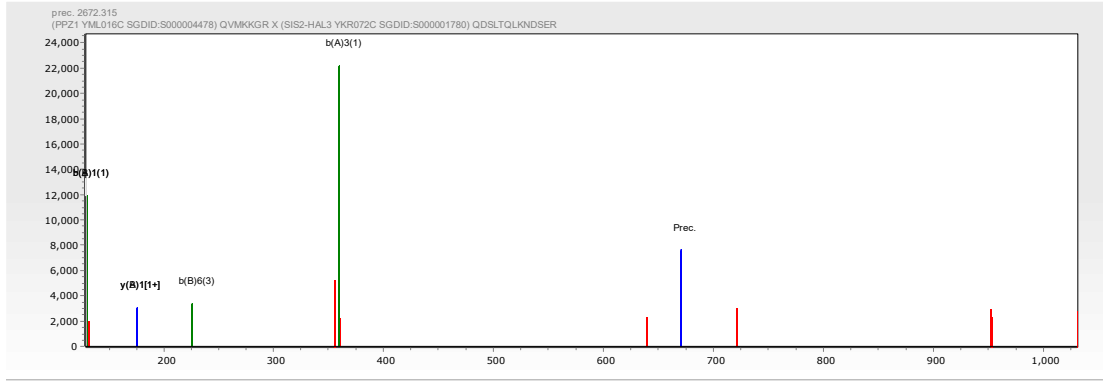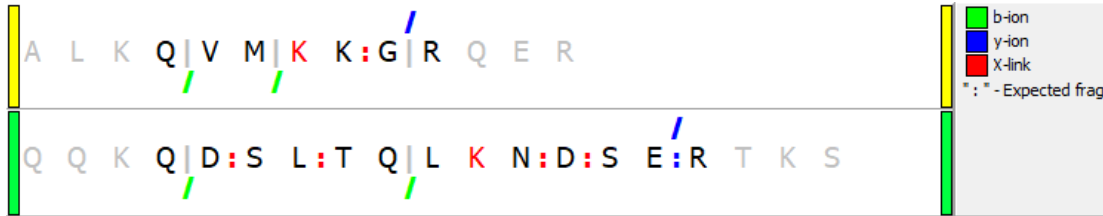

359 x 41

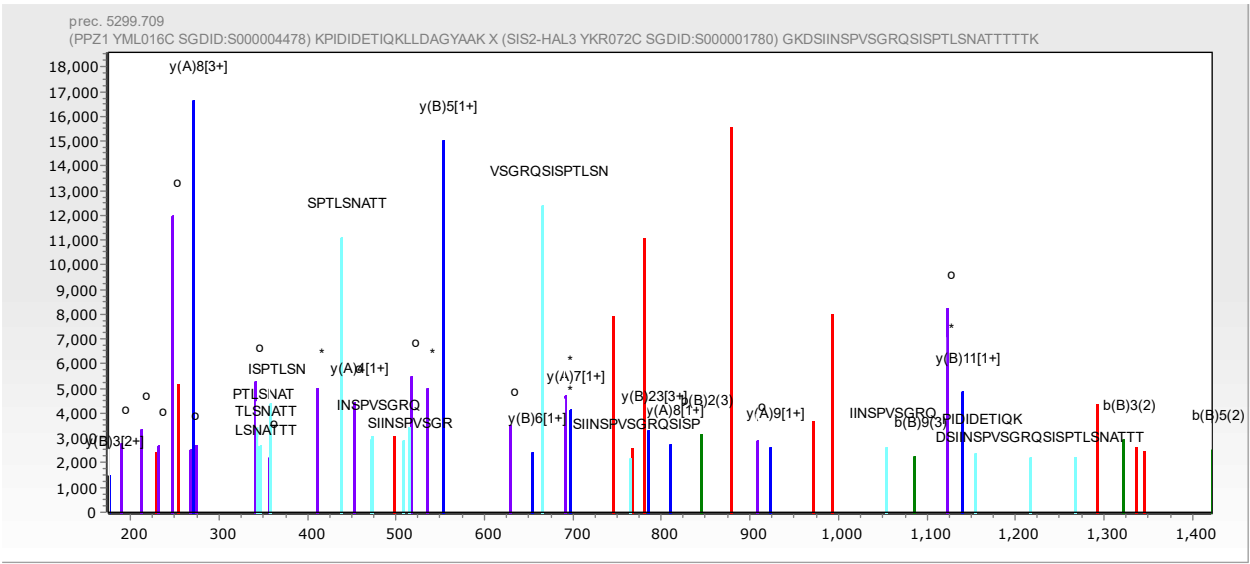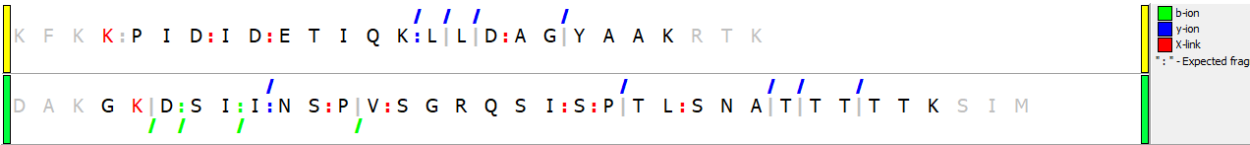

[illegible]

381 x 483

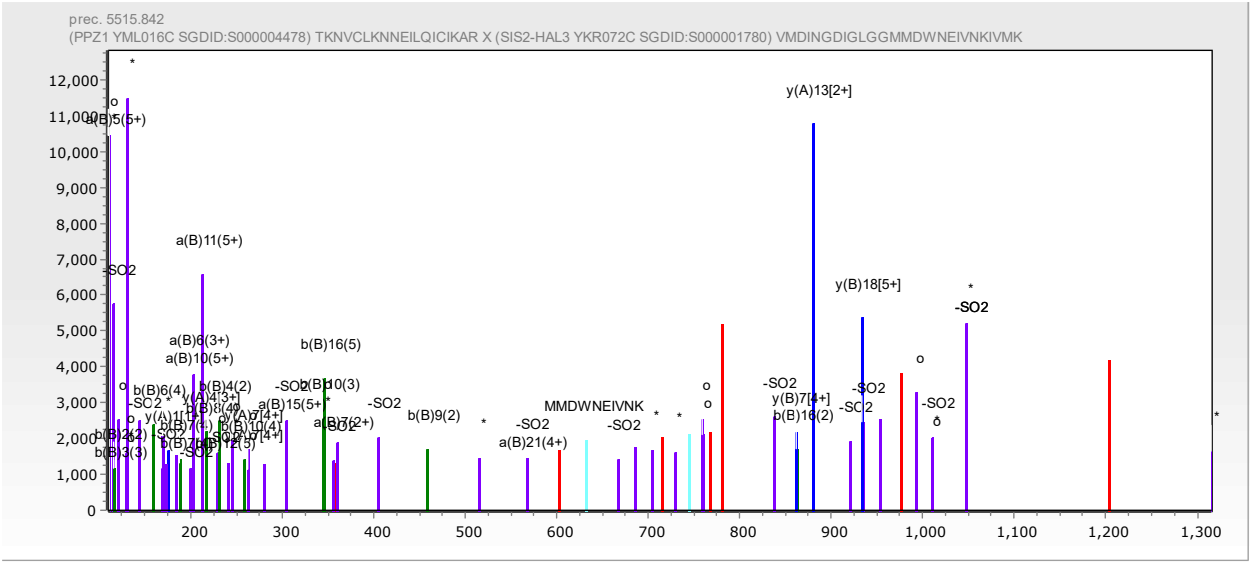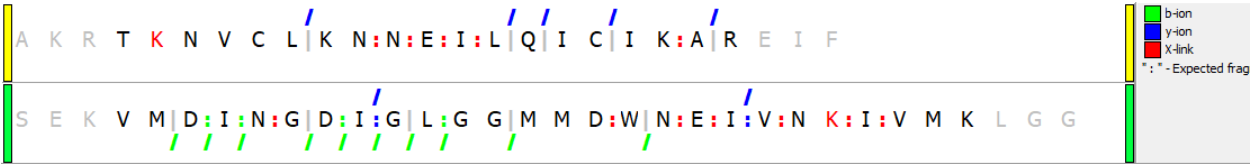

415 x 201

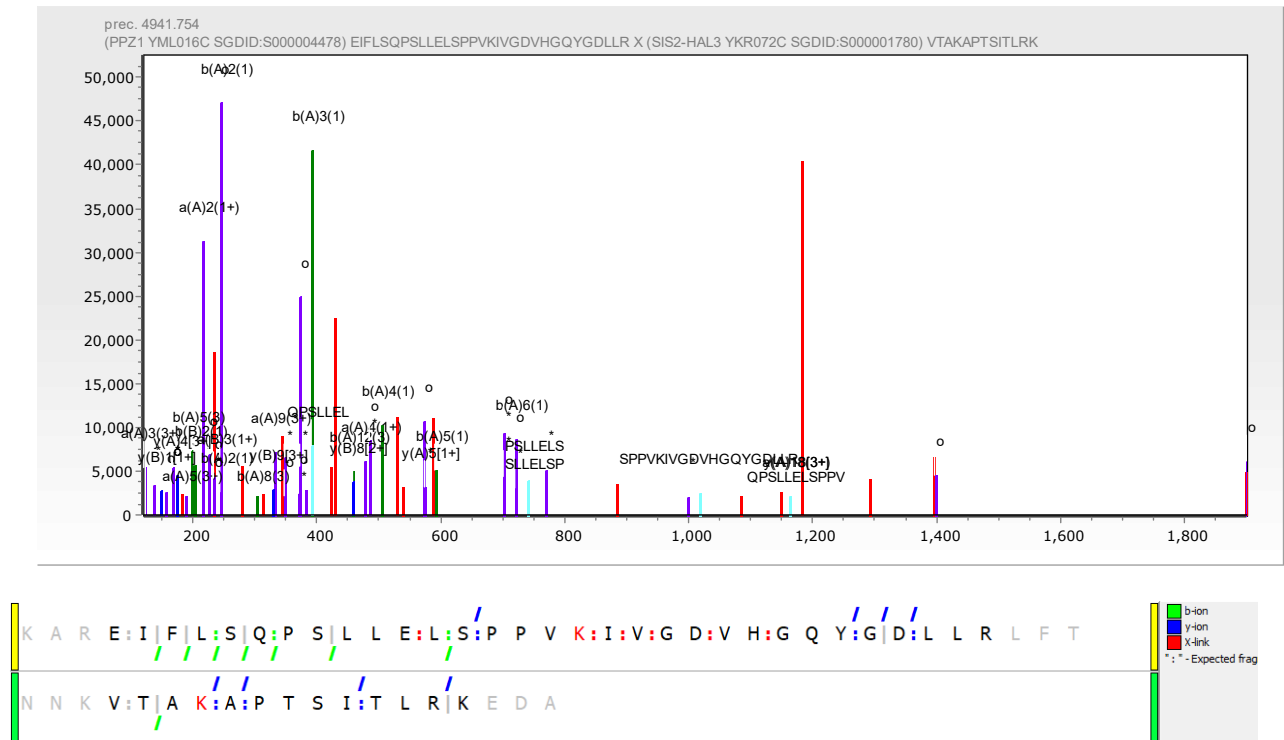

433 x 210

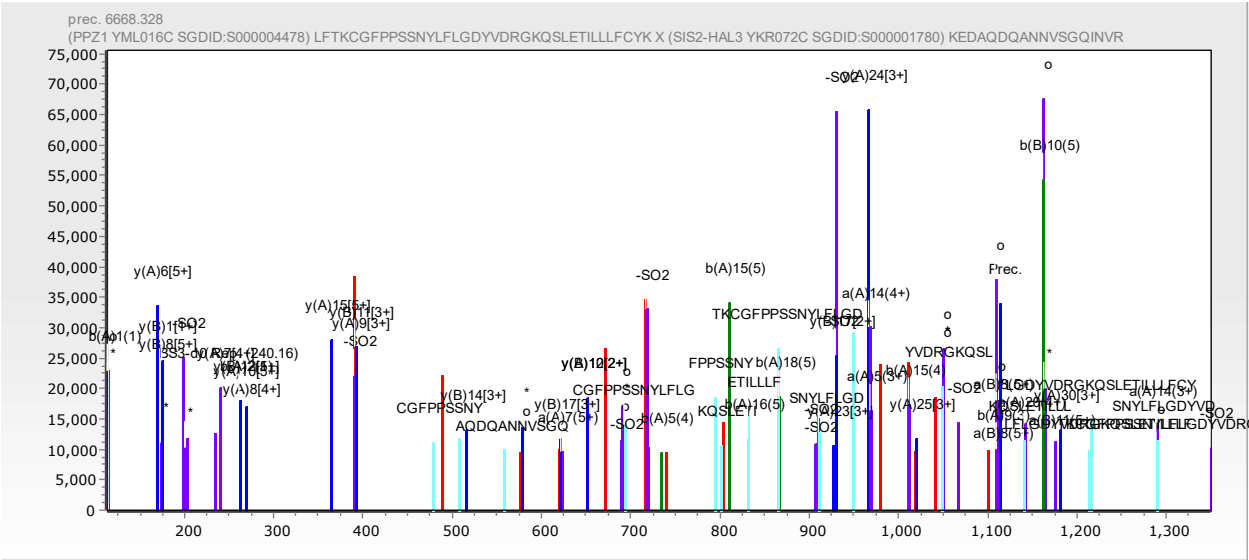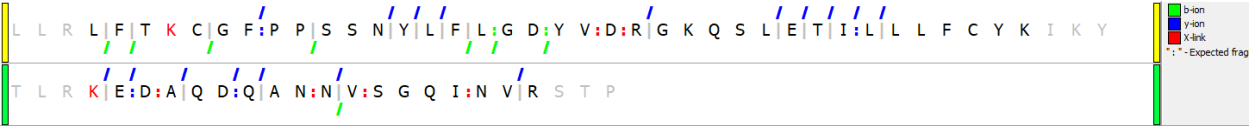

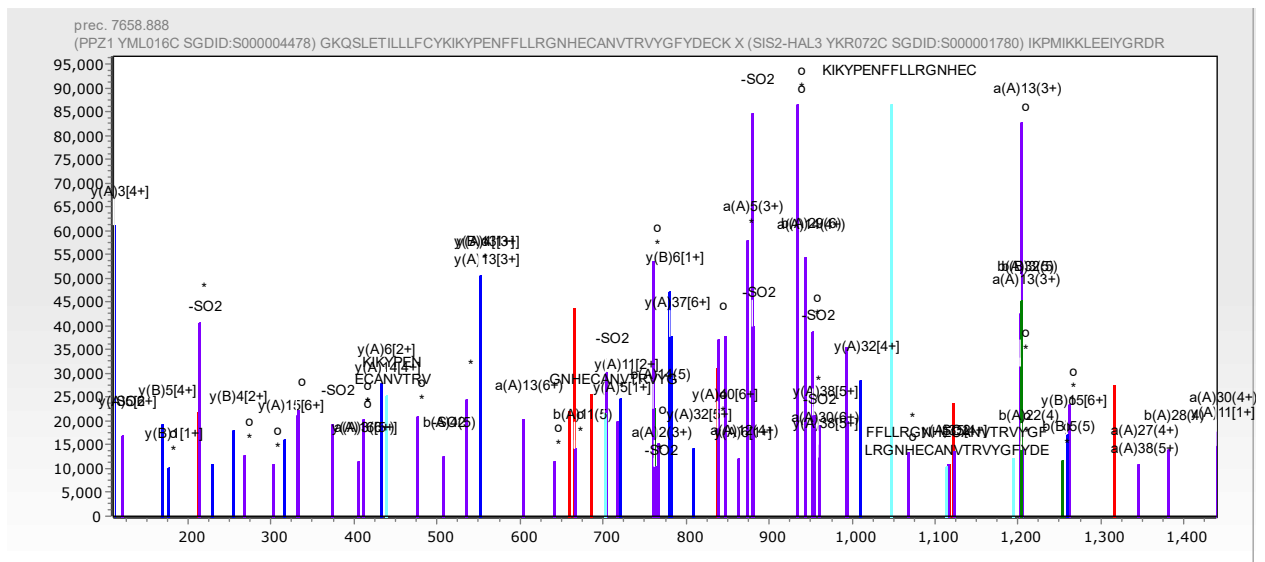

---

453 x 280

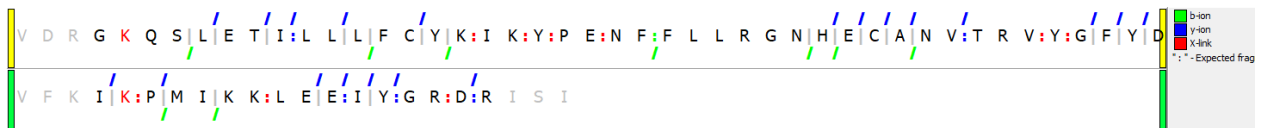

468 x 201

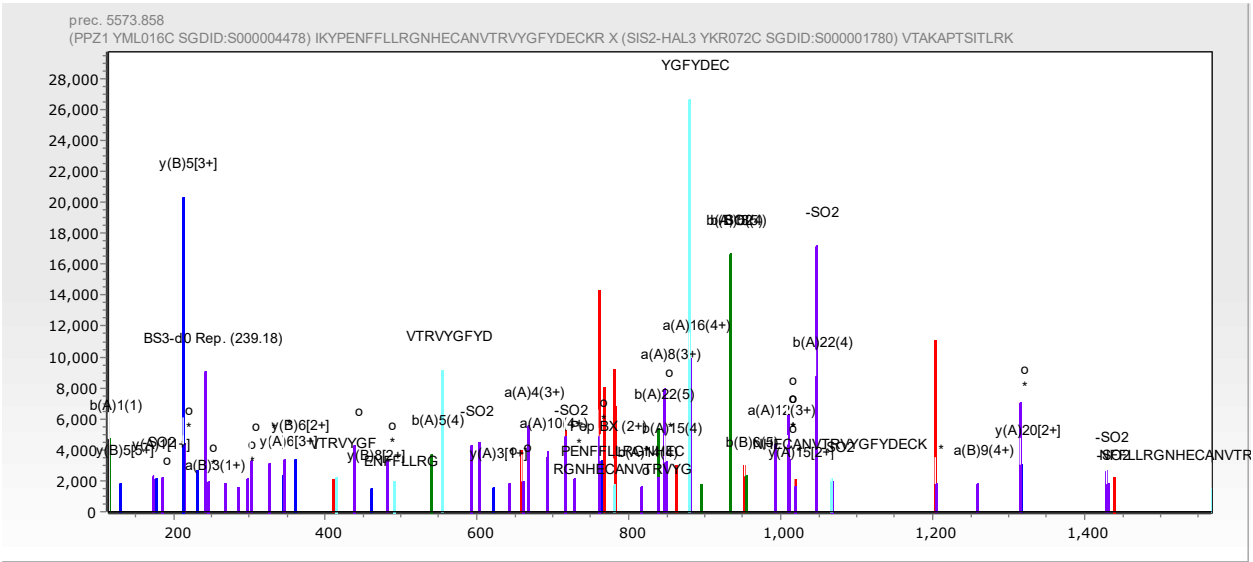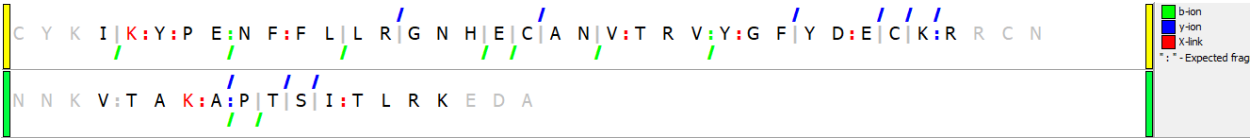

664 x 483

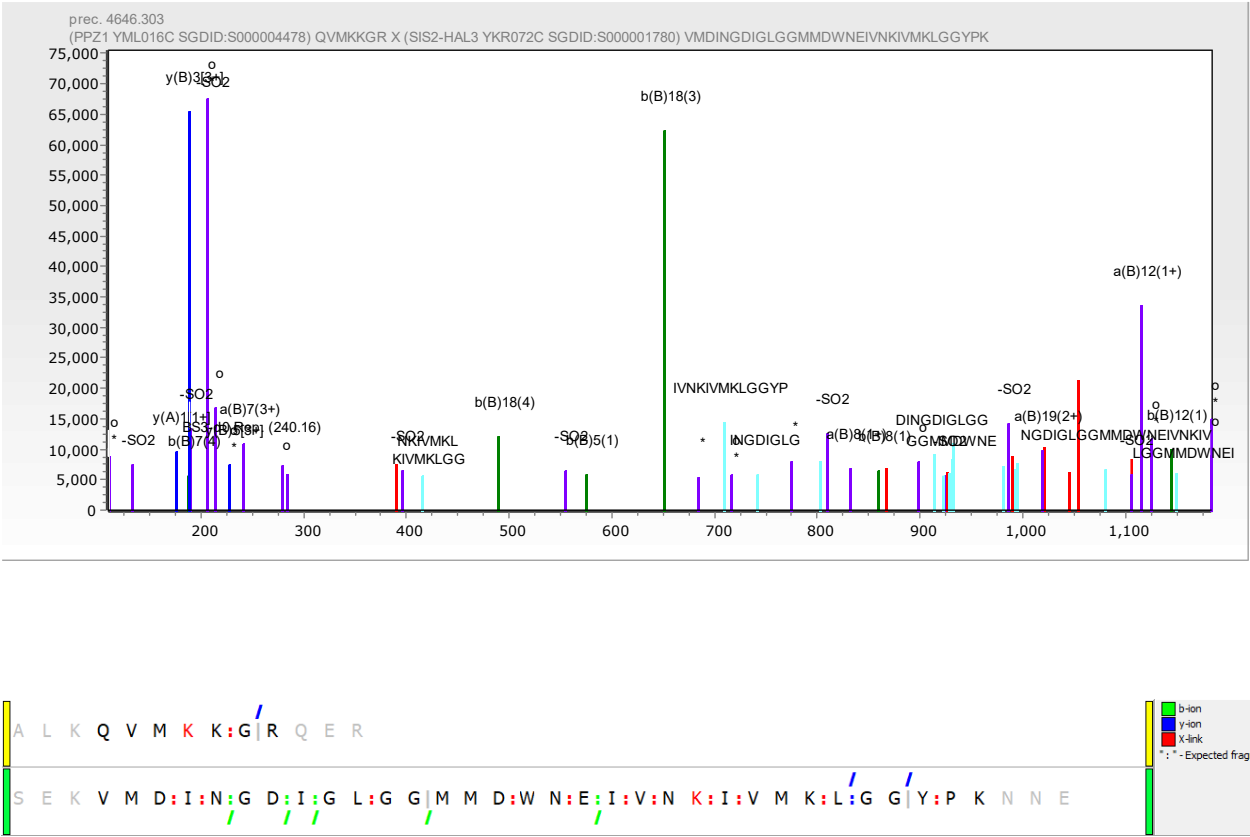

359 x 39

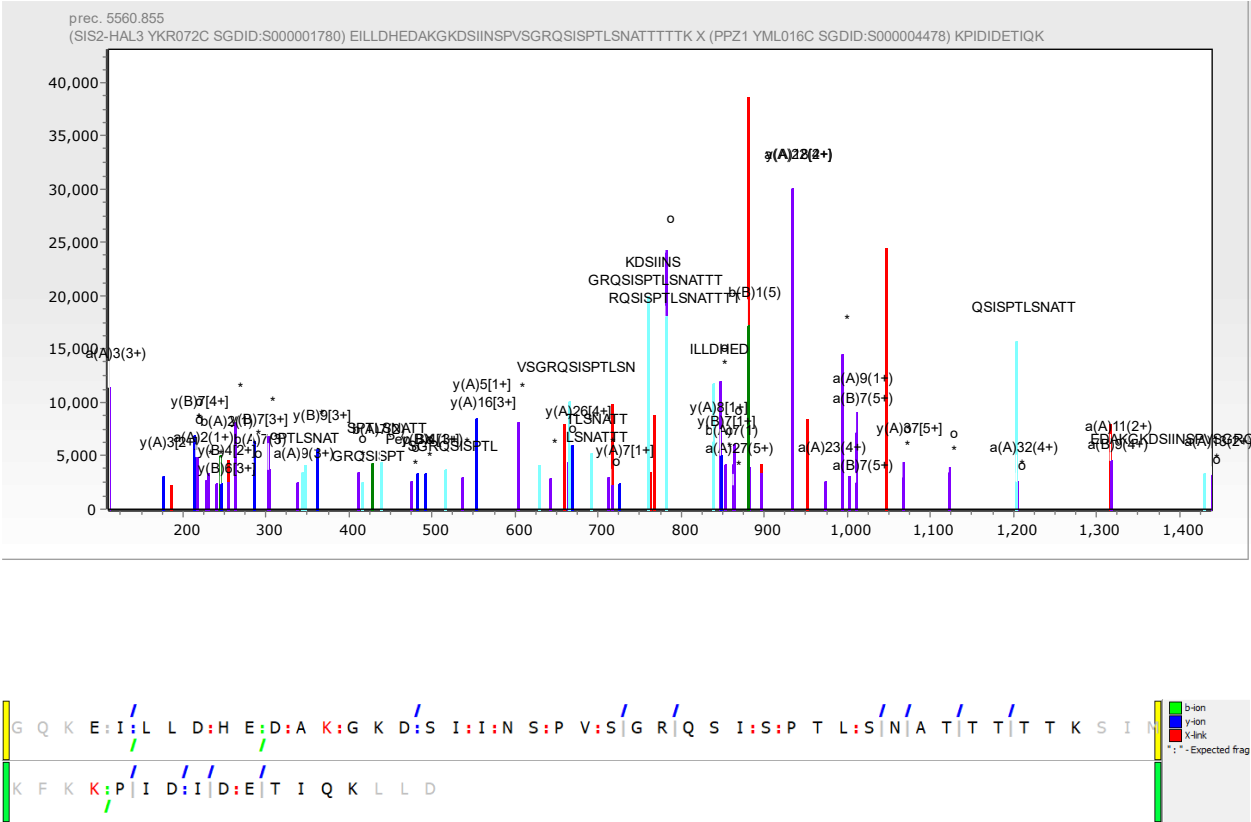

496 x 315

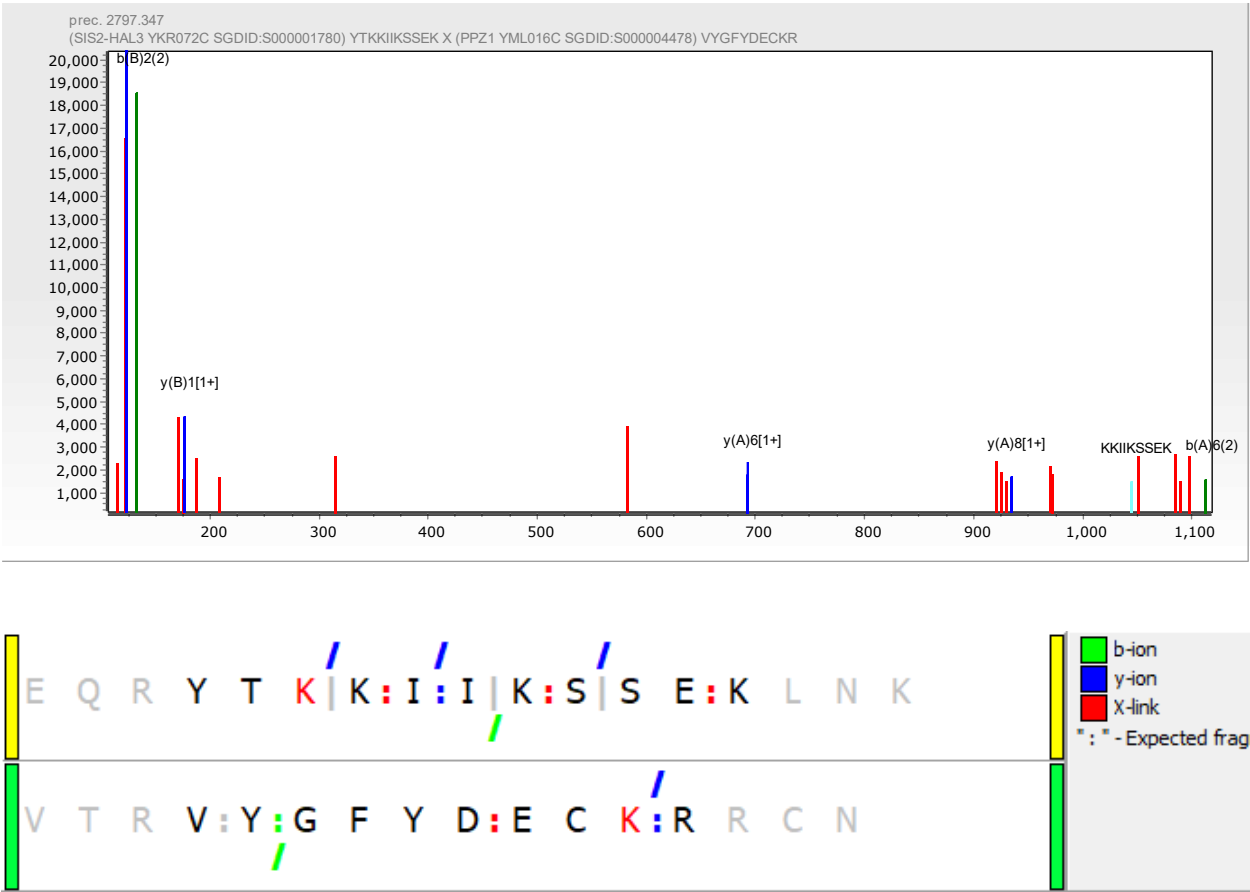

358 x 29

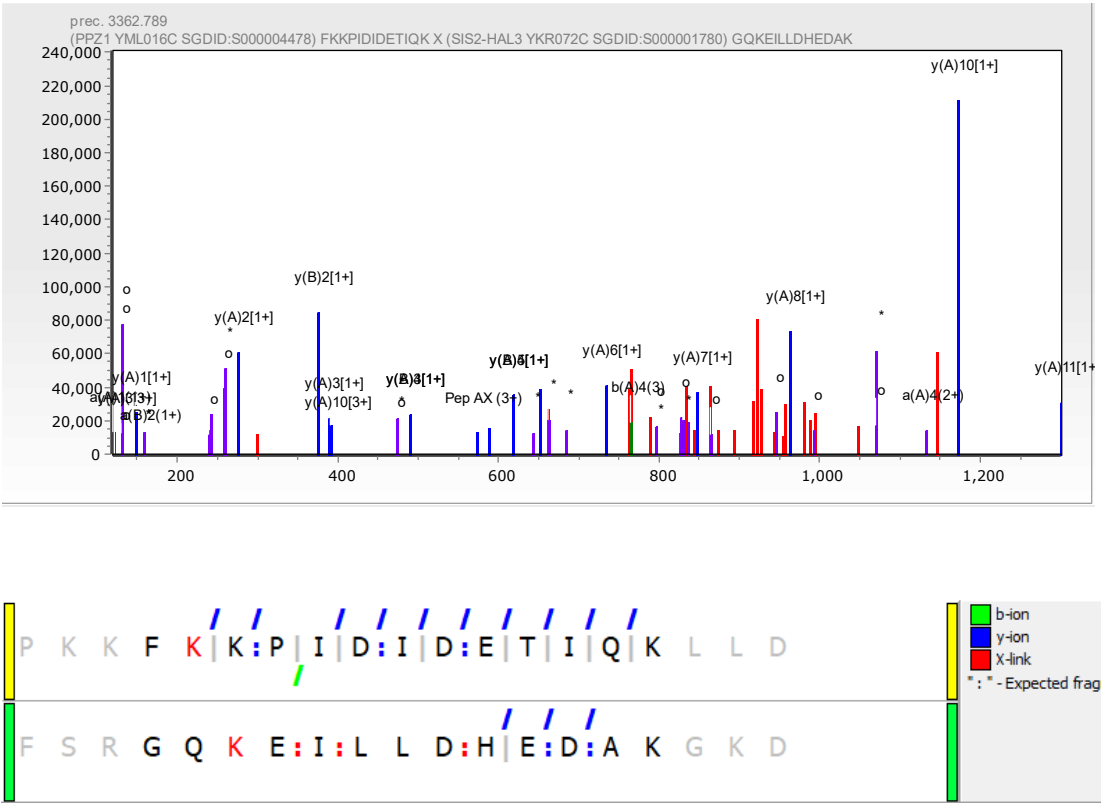

358 x 315

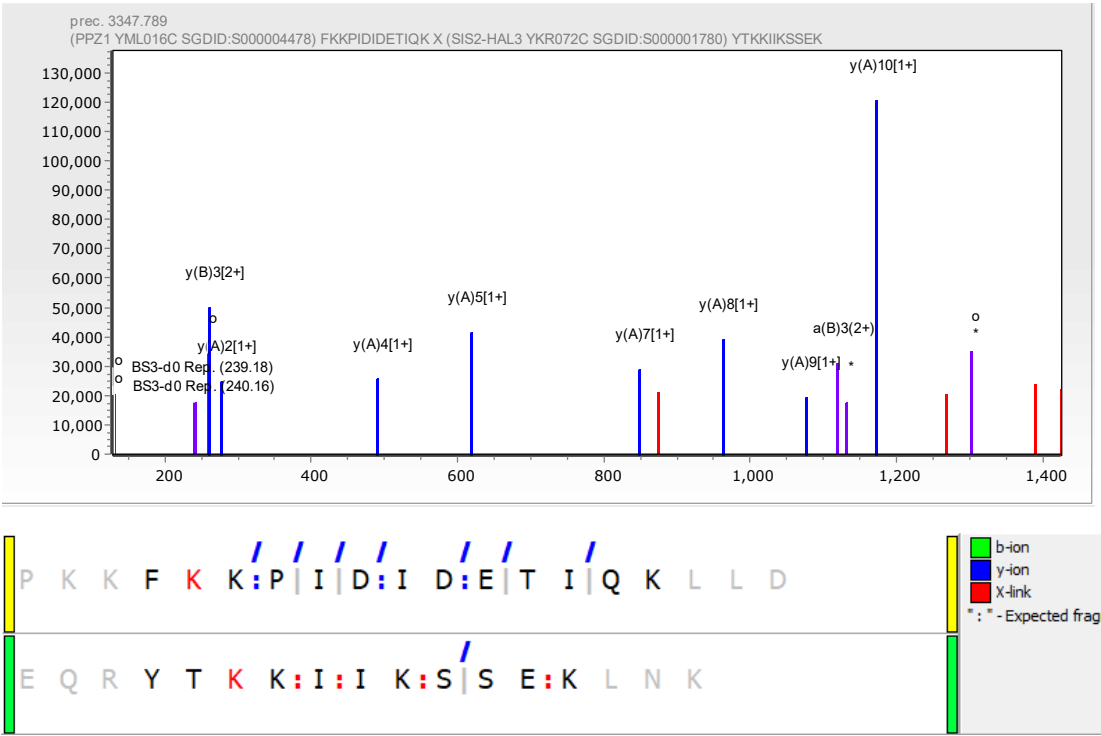

433 x 210

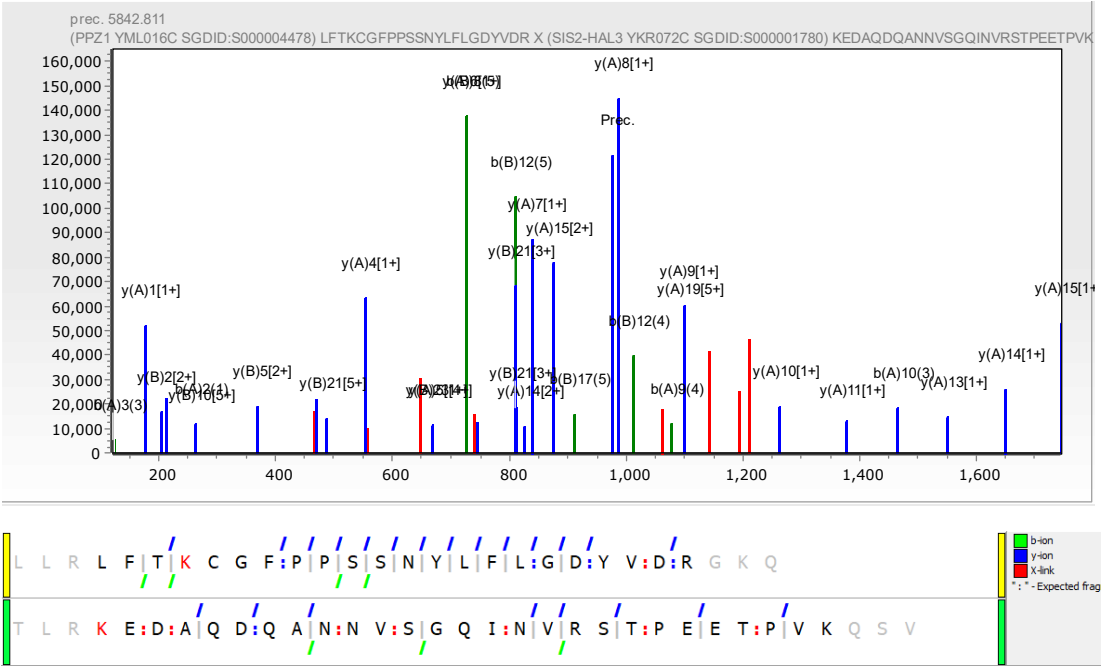

584 x 90

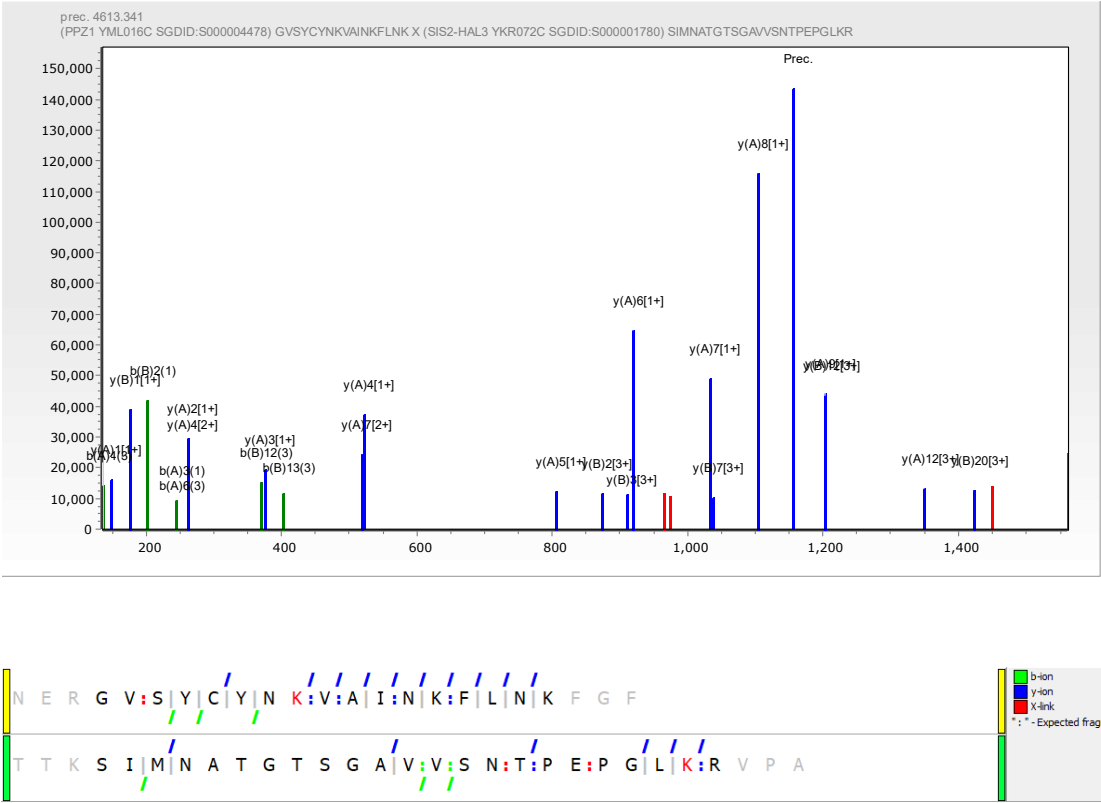

584 x 113

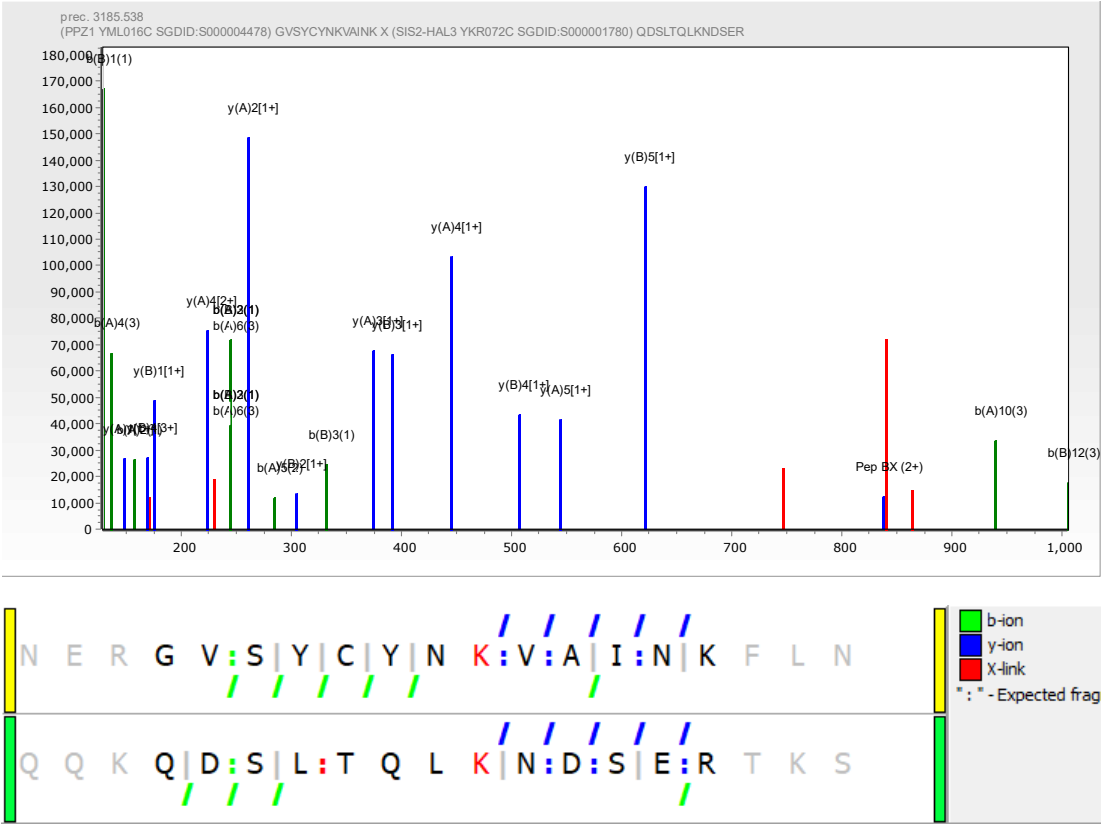

584 x 323

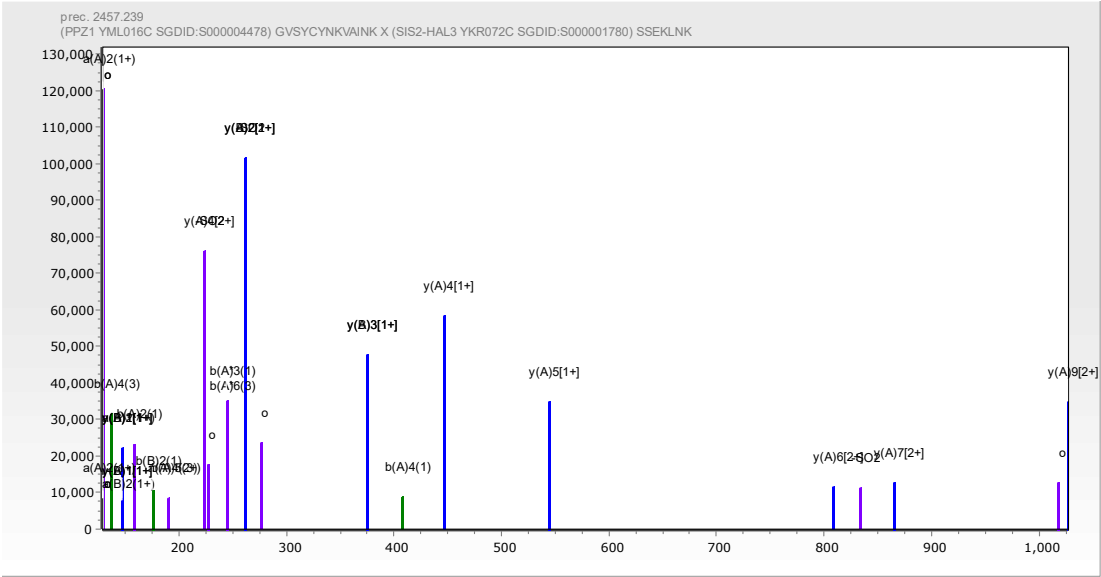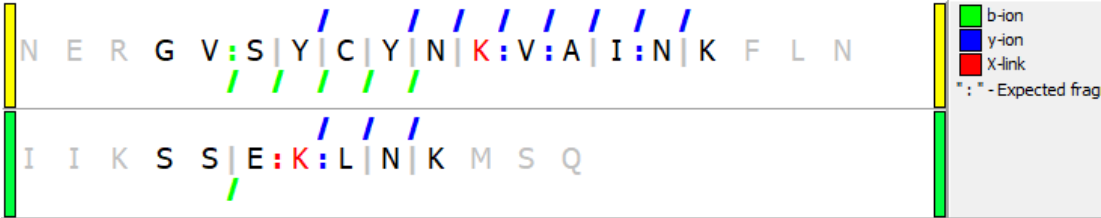

389 x 90

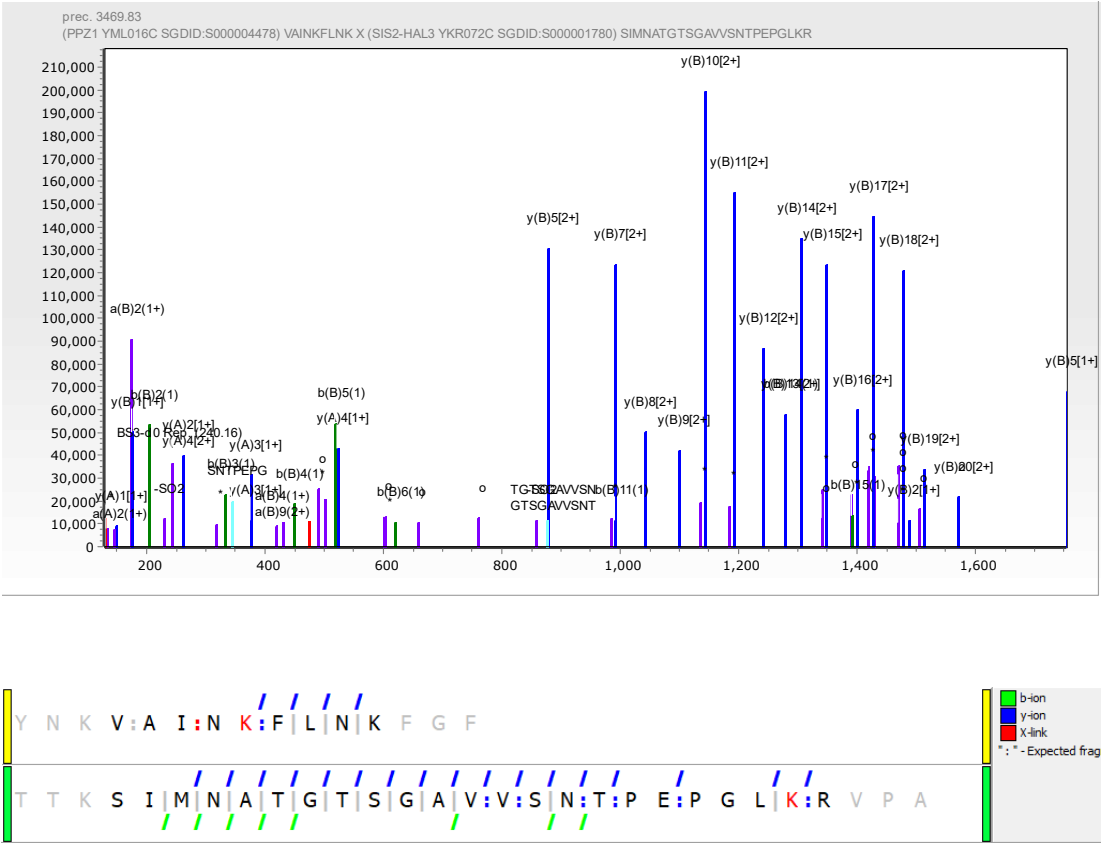

Supplement: s1 [file s1]
