# Supplementary material for: Comparative Analysis of Type 1 and Type Z Protein Phosphatases Reveals D615 as a Key Residue for Ppz1 Regulation
Source: MDPI journal article supplement (doi:10.3390/ijms23031327), 2022-01-25
Supplement: s1 [file s1]

**Figure S1. Alignment and consensus sequence from fungal PP1 and PPZ phosphatases.** Alignment was performed with Clustal Omega. Consensus sequences and shading of residues was performed with pyBoxshade (<https://github.com/mdbaron42/pyBoxshade>). The threshold fraction for consensus was set to 0.8. For a given phosphatase **residue** denotes that all residues are the same, **residue** denotes that it is identical to the consensus, **residue** that it is similar to the consensus, and **residue** that it is different from the consensus. A snapshot of the pyBoxshade preferences setting is presented at the end of the alignments

```

.....10.....20.....30.....40.....50.....
2YaLi_Glc7 -----madqkeVLDLsVIDRLLEVRG-sRPGKqVqLmEhEIRYLCtKAREIFIqQP
2Mgui_PP1 -----madhgeaDIDLsIvDRLLEVRG-sRPGKqVtLmEhEIRYLCtKAREIFIqQP
2DEHA_Glc7 -----madhgeaDIDLsIvDRLLEVRG-sRPGKqVtLlEhEIRYLCtKAREIFIqQP
2Mfar_PP1 -----maehqeVDIDLsIvDRLLEVRG-sRPGKqVtLlEhEIRYLCtKAREIFIqQP
2Ct_Glc7 -----msnieddssIsVDsIvDRLLEVRG-sRPGKqVaLsEnEIRYLCtKAREIFIqQP
2Cgla_Glc7 -----mesqqVDVDSIIDRLLEVRG-sKPGqqVdLeEhEIRhLCsKARSIFIkQP
2Ca_Glc7 -----msnnieddssIsVDnIvDRLLEVRG-sRPGKqVtLtEnEIRFLCtKAREIFIqQP
2Cdub_PP1 -----msnniddssIsVDnIvDRLLEVRG-sRPGKqVtLtEnEIRFLCtKAREIFIqQP
2Klac_PP1 -----mdqqsVDVdDIIDRLLEVRG-lKPGHqVdLeEhEIRYLCsKARSIFIkQP
2Lther_Glc7 -----metpaVLDLnIIDRLLEVRG-sKPGqqVdLeEhEIRFLCsKARSIFIkQP
2Ag_PP1 -----msmetppVIDnIIDRLLEVRG-sKPGqqVdLeEhEIRYLCsKARSIFIkQP
2Ecym_Glc7 -----metppVIDnIIDRLLEVRG-sKPGqqVdLeEhEIRYLCsKARSIFIkQP
2Tbla_PP1 -----meatqVDVnIIDRLLEVRG-sKPGqqVdLeEhEIRYLCsKARSIFIkQP
2Tdel_PP1 -----metpaVDVnIIDRLLEVRG-sKPGqqVdLeEhEIRYLCsKARSIFIkQP
2Sc_Glc7 -----mdsqpVDVnIIDRLLEVRG-sKPGqqVdLeEhEIRYLCsKARSIFIkQP
1Tmel_Glc7 -----madqteVLDLsIIDRLLEVRG-sRPGKqVqLlEaEIRYLCtKAREIFIsQP
1Bcin_PP1-A -----maepeVLDLsIIDRLLEVRG-sRPGKqVqLlEqEIRYLCtKAREIFIsQP
1Nc_PP1 -----madhteVLDLsIIDRLLEVRG-sRPGKqVqLlEaEIRYLCtKAREIFIsQP
1Mthe_PP1 -----madqhdVLDLsIIDRLLEVRG-sRPGKqVqLlEaEIRYLCtKAREIFIsQP
1Bbas_PP1 -----madqhdVLDLsIIDRLLEVRG-sRPGKqVqLlEsEIRYLCtKAREIFIsQP
1Anam_PP1 -----madqqdVLDLsIIDRLLEVRG-sRPGKqVqLlEtEIRYLCtKAREIFIsQP
1Npar_PP1 -----maeqeVLDLsIIDRLLEVRG-sRPGKqVqLlEtEIRYLCtKAREIFIsQP
1Bory_Glc7 -----maeteVLDLsIIDRLLEVRG-sRPGKqVqLlEtEIRYLCtKAREIFIsQP
1Uree_PP1 -----madqneIDLsIIDRLLEVRG-sRPGKqVqLlEsEIRhLCtKAREIFIsQP
1Tver_PP1 -----madqneIDLsIIDRLLEVRG-sRPGKqVqLlEsEIRhLCtKAREIFIsQP
1Anid_Glc7 -----madqdVLDLsIIDRLLEVRG-sRPGKqVqLlEsEIRYLCtKAREIFIsQP
1Aory_Glc7 -----msekeeVLDLsIInRLLEVRG-sRPGKhVrLqDsEIqYLChKAREvFIsQP
1Af_PP1 -----madqeVLDLnIIDRLLEVRG-sRPGKqVqLlEaEIRYLCtKAREIFIsQP
3Sp_PP1-1 -----msnpdVLDLsIIDRLLEVRG-sRPGKqVqLsEdEIRFLCnKAREIFIsQP
3Sp_PP1-2 -----mdyDIDaIEKLvkArN-gKpsKqVqLsDaEIRYLCttsRsIFLsQP
3Sj_PP1 -----mskqdVLDLsVIDRLLEVRG-sRPGKqVqLaEhEIRFLCnKAREIFIsQP
3Sj_Sds21 -----mepDvDtIEKLLkVRn-nKPGKqVqLaDsEIRFLCsKAREIFLeQP
3Scot_PP1 -----msnqdVLDLsIIDRLLEVRv-nRPGKqVqLaEnEIRFLCnKAREIFIsQP
3Scot_Sds21 -----mdyDIDnIEKLlkVqh-vKPGRqtqLsEaEIRYLCktARSFLdQP
3Scry_PP1 -----msnqdVLDLsIIDRLLEVRG-nRPGKqVqLaEnEIRFLCnKAREIFIsQP
3Scry_Sds21 -----mdyDIDtIEKLlkVqh-vKPGRqtqLteEaEIRYLCttsRsIFLnQP
3Plac_PP1 -----measnteIDIDqVlaRLLEVRG-sRPGKqVqLpEyEIKFLCtKAREIFInQP
3Pjir_PP1 -----madqheIDLsVIDRLLEVRG-sRPGKqVqLaEcEIRFLCiKAREIFvnQP
3Nirr_PP1 -----madqneIDLnIIRLLEVRG-nRPGKqVtLgEyEIRYLCtKAREIFInQP
4GALMADRAFT_Glc7 -----madtateIDLsVIDRLLEVRG-nRPGKpVqLaEyEIKYLCtKAREIFInQP
4PILCDRAFT_Glc7 -----madstteIDLsVIDRLLEVRG-nRPGKpVqLqEyEIKYLCtKAREIFInQP
4Shir_Glc7 -----madsateIDLsVIDRLLEVRG-nRPGKpVqLqEyEIKYLCtKAREIFInQP
4Sver_PP1 -----maestteIDLsVIDRLLEVRG-nRPGKpVqLqEyEIKYLCtKAREIFInQP
4Pgig_PP1 -----madttteIDLsVIDRLLEVRG-nRPGKpVqLqEyEIKYLCtKAREIFInQP
4Bbot_PP1 -----maesspeIDLsVIDRLLEVRG-nRPGKpVqLqEyEIKhLCmKAREIFInQP
4Cvis_PP1-A -----maeqaeIDLsVIDRLLEVRG-nRPGKpVqLqEyEIKYLCtKAREIFInQP
4Cvis_PP1-B -----mnlndiqkeVIDsVIDRLLEVRG-nRPGKpVnLhEyEIKYLCaKAREIFlaQP
4Cgat_PP1 -----mgeqpeIDLsVIDRLLEVRG-nRPGKaVqLaEyEIKYLCtKAREIFIsQP
4Cneo_PP1 -----mgeqpeIDLsVIDRLLEVRG-nRPGKaVqLaEyEIKYLCtKAREIFIsQP
4Tmes_PP1 -----madqtneIDLsVIDRLLEVRG-nRPGKaVqLqEyEIKYLCtKAREIFIsQP
4Umay_Glc7 -----madnttleVLDLnVIDRLLEVRG-sRPGKpVhLeEyEIKYLCtKARDIFInQP
4Phub_PP1 -----madnstpeVLDLnVIDRLLEVRG-sRPGKpVhLeEyEIKYLCtKARDIFInQP
5Wich_Glc7 -----mseaeVLDLsVIDRLLEVRG-nRPGKpVqLqEyEIKYLCtKAREIFIsQP
5Rgra_PP1 -----maaeqqdIDLsIIDRLLEVRG-nRPGKqVqLqEyEIKFLCtKAREIFInQP
5Pgra_PP1 -----madqggqdIDLsVIDRLLEVRG-nRPGKqVqLqEyEIKFLCtKAREIFInQP
6Rdel_PP1 -----mtevpVNVDSIIRLLEVRG-nRPGKqVqLgEqEIRYLCtAREIFMsQP
6Ccor_PP1 msqilnnpnagseeVDInsIIDRLLEVRG-sRPGKhVlLaEhEIKYLCtAREIFLgQP
6Crev_PP1 -----maddgVNVDSIIqRLLEVRG-sRPGKeVqLhEaEIHwLCvtAREIFInQP
6Spun_PP1 -----mmaenqeVDVDSIIRLLEVRG-sRPGKqVqLaEhEIRYLCtKAREIFInQP
6Gpro_PP1-A -----mgepsqdVDVDSIIRLLEVRG-sRPGKqVqLaEhEIRYLCtKAREIFInQP
6Gpro_PP1-B -----maeqqvVDIDLsIIDRLLEVRG-nRPGKqVqLaEhEIRYLCtKAREIFvnQP
6AMAG_PP1-A -----mapprrat---hRwh-rar-vRvGKqrpv----Rsq--vrpsrqrvsP
6Rallo_PP1 -----msaepeVDVDSIIRLLEVRG-sRPGKqVqLaEhEIRhLCvKsREIFMsQP

```

```

.....10.....20.....30.....40.....50.....60
2YALI_Ppz1 -----mtlnIDevIqRLLDaGYsgKiTKaVcLKNsEialICrrARSllsQP-
2Mgui_Ppz1 -----ntidIEDlIqRLLDaGYsgKkSKnLcLKNsEIqlVCakAREIFLsQP-
2DEHA_Ppz1 -----gsidIEnlIqRLLDaGYsgKkTKsVcLKNhEIqlICakARNllsQP-
2Mfar_Ppz -----nsidIEnlIqRLLDaGYsgKkTKsLcLKNqEIqlVCatAREIFLqQP-
2Ct_Ppz1 -----tnssqIDvwIdKLInaYs-KrTKnVcLKNsEieiICssAREIFLsQP-
2Cgla_Ppz1 -----kqvnIDeaIqRLLDvGYsgKknKafcLKNsEiiqICiqAREVFLNQP-

```

|                  |                                                         |
|------------------|---------------------------------------------------------|
| 2Cgla_Ppz2       | -----kpidIDdtIqKLLDaGYaaKrTKnVcLKNsEiaqICqkAREIFLaQP-   |
| 2Ca_Ppz1         | -----ntidIDslIdKLLnaGFsgKrTKnVcLKNtEielICasAREIFLsQP-   |
| 2Cdub_Ppz        | -----ntidIDslIdKLLnaGFsgKrTKnVcLKNsEielICasAREIFLsQP-   |
| 2Klac_PpzA       | -----kpidIDetIqKLLDaGYsaKkTRsVaLKNsEItqICqmAREIFLsQP-   |
| 2Klac_PpzB       | -----kpidIDetIqKLLDaGYsaKkTRsVaLKNsEItqICqmAREIFLsQP-   |
| 2Lther_Ppz1      | -----rpldIDetIqKLLDaGYsgKrTKnVcLKNsEiaqICnqvREIFLsQP-   |
| 2Ag_Ppz          | -----kpIdIDemIqKLLDaGYlgKrTRnVcLKNsEiaqIChlAREIFLsQP-   |
| 2Ecym_Ppz        | -----kpIdIDemIqKLLDaGYlgKrTRnVcLKNsEiaqIChlAREIFLsQP-   |
| 2Tbla_PpzA       | -----kpidIDltIqKLLDaGYaaKkTKnVcLKNsEiaqIChlvREIFLsQP-   |
| 2Tdel_PpzA       | -----rpInIDetIqKLLDaGYagKrTKnVcLKNsEiaqIChmAREMFLsQP-   |
| <b>2Sc_PPZ1</b>  | -----kpidIDetIqKLLDaGYaaKrTKnVcLKNsEiaqICikAREIFLsQP-   |
| 2Sc_PPZ2         | -----rpvdIDeiIqRLLDaGYaaKrTKnVcLKNsEiaqIChkAREIFLaQP-   |
| 1Tmel_Ppz1       | -----mItRLLDaGYagKvTKaVcLKNaEitaIChaAREVFLsQs-          |
| 1Bcin_Ppz        | -----kdkdLDdyIsRLLDaGYqgKsTKgVcLKsaEinsIClrAREIvLeQP-   |
| 1Nc_PP-Z         | -----kdidLDdfIkRLLDaAYagKvTKsVcLKNaEivaIChrAREIFLsQP-   |
| 1Mthe_Ppz        | -----kdidLDdfIkRLLDaAYagKvTKsVcLKNaEitaIChrAREVlLtQP-   |
| 1Bbas_Ppz        | -----kemdLDdyIkRLLDaGYagKvTKsVcLKNaEivaICqrAREVlLsQP-   |
| 1Anam_Ppz        | -----ktsdLDdmIsRLLDaGYagKvTKtVcLKNaEifaICqaAREVFLsQP-   |
| 1Npar_Ppz1       | -----ksidLDdmIsRLLDaGYsaKvTKtVcLKNaEifaICqaAREIFLsQP-   |
| 1Bory_Ppz1       | -----ktmdLDdmIqRLLDaAYagKvTKtVsLKNaEifaICsaAREVFLsQP-   |
| 1Uree_Ppz        | -----ksidVDdmItRLLDaGYsaKvTKaVcLKNaEiaICaaARELlLsQP-    |
| 1Tver_Ppz        | -----ksidVDdmItRLLDaGYstKvTKaVcLKNaEiaVctaARELlLtQP-    |
| 1Anid_Ppz1       | -----ksidLDdmItRLLDaGYstKvTKtVcLKNaEitaICtaAREIFLsQP-   |
| 1Aory_Ppz1       | -----lksidLDdmItRLLDaGYstKvTKtVcLKNaEitaICtaAREIFLsQP-  |
| 1Af_PPZ          | -----lksidLDdmIsRLLDaGYstKvTKtVcLKNaEimaICsaAREIFLsQP-  |
| 3Sp_PPZ          | -----vslnVDemIqRLLIhVGYsrKsSKsVcLKNaEitsICmavREIFLsQP-  |
| 3Sj_Pzh1         | -----gglnVDemIqRLLIhaGYsrKsTKsVcLKNaEitsICmavSEIFLsQP-  |
| 3Soct_Ppz        | -----vslnVDemIqRLLIhaGYsrKsSKsVcLKNaEivsICmavREIFLsQP-  |
| 3Scry_Ppz        | -----vslnVDemIqRLLIhaGYsrKsSKsVcLKNaEivsICtavREIFLsQP-  |
| 3Plac_Ppz        | -----knidVDdlIqRLLDaGYtgKaTKsVvLKNaEivaICAavREIlLsQP-   |
| 3Pjir_Ppz-A      | -----Qp-                                                |
| 3Nirr_PP-Z       | -----aglaLDdyIsRLLDaGYsaKvTKtVcLKNaEifqIClaARDtFLaQs-   |
| 4GALMADRAFT_Ppz1 | -----kqfdVDdmIqRLLDvGYtgKvSKsLcLKNtEitaIClaARDVFLsQP-   |
| 4PILCRDRAFT_Ppz1 | -----ksldVDdmIqRLLDvGYtgKvSKsLcLKNaEiaqICqaAREVFLnQP-   |
| 4Shir_Ppz        | -----ksfdIDdmIqRLLDvGYtgKvSKsLcLKNvEiaaICqaAREVFLsQP-   |
| 4Sver_PPZ        | -----rtldIDdmIaRLLEvGYsgKvSKhVcLKNtEitsLclaAREVFLsQP-   |
| 4Pgig_PPZ        | -----apldIDdmIqRLLDvGYtgKvSKsLcLKNtEitaICqaAREVFLnQP-   |
| 4Bbot_PPZ        | -----rtfdIDdmIsRLLEvGYsgKaSKaVcLKNnEitaICqaAREVFLsQP-   |
| 4Cvis_PPZ        | -----ntidIDslIsRLLIatAYtgKvSKsLpLKtsEitsIClaARDIFLsQP-  |
| 4Cgat_PPZ        | -----mIqRLLaGYsgKvTKsppLKNaEivsVcaaAREVFLsQP-           |
| 4Cneo_PPZ        | -----qildVDnmIqRLLaGYsgKvTKsppLKNaEitsVcaaAREVFLsQP-    |
| 4Tmes_PPZ        | -----gamdLDnmIsRLLaGYsgKvTKsppLKNaEianVcaaAREVFLsQP-    |
| 4Umay_PPZ        | -----vrtfdIDdmIsRLLaGYsgKipK-paLKNaEitaVCqaAREIFLsQP-   |
| 4Phub_PPZ        | -----vrtfdIDdmIsRLLaGYsgKipK-paLKNaEitaVCqaAREIFLsQP-   |
| 5Wich_PP-Z       | -----gsidIDdmIqRLLniGYsaKySKsLpIKpeELtqLlqlsRNLlLnQP-   |
| 5Rgra_PPZ1       | -----mIsRLLDaGYsgKvTKsVcLKNaEitaICqaAREVFLsQP-          |
| 5Pgrr_PPZ        | -----qafdIDeiInRLLDvGYstKiTKsVcLKNsEitaIslaAREVlLsQP-   |
| 6Rdel_PPZ-A      | -----sttnIDeyInRLLaGYssKvSKqLcLRhsEvtaICraAmDIFLsQP-    |
| 6Rdel_PPZ-B      | -----wnldIDecIhRLLDiGlktKvpKsIcfRNSEivaICraAQVFLsQP-    |
| Rdel_PPZ-C       | -----sttnIDdyInRLLaGYssKvSKqLcLRssEvtaICraAmDIFLeQP-    |
| 6Rdel_PPZ-D      | -----dglqIDdyIrRLLDaGYasKvpKqLcLKNaEvtlICrtAmEIFLsQPy   |
| 6Rdel_PPZ-E      | -----MNscIkRLLIqvGmnkqigKsVcLnpsEitaICrsvyEIFMnQP-      |
| 6Rdel_PPZ-G      | -----sttnIDeyInRLLaGYssKvSKqLcLRhsEvtaICraAmDIFLsQP-    |
| 6Ccor_PPZ        | -----gginIDdcIsRLLaGstaKtpKaLdIeawEidsICalsREIFLsQP-    |
| 6Crev_PPZ        | -----kqfsVDdmIfRLLDaGFsgRvSKsVcLRNsEivaVChaAREVFLaQP-   |
| 6Spun_PPZ        | -----kdkyIDdiIaRLLDarn-hKvSKsLcLKNsEvlsVChkAREVFLsQP-   |
| 6Gpro_PPZ        | -----aaeisLDdiIqRLLgqr-gaKpgKaLpvKNqEImfVCqrAREVFLdQPi  |
| 6AMAG_PPZ-A      | -----aktldIDdvIhRLLInaGs-gKvgRnLpLKNsEiitIlhaARDIFLsQP- |
| 6AMAG_PPZ-B      | -----MgsgqsKfLDaGr-gKngvaapn-----                       |
| 6Rallo_Ppz1      | -----vfvdIDeiIqRLLaEiknqpKlqRyMvvKtnEilsICsiAREIFLaEP-  |

consensus PP1  
consensus PPZ

vdld iidrllevrg rpgk v l e eirylc kareifi qp  
id i rlld gy k tk v lkn ei ic areifl qp

|                  |                                                               |
|------------------|---------------------------------------------------------------|
|                  | .....10.....20.....30.....40.....50.....60                    |
| 2YaLi_Glc7       | -ILLELEAPIKICGDIHGQYYDLLRLFEYGGFPPEANYLFLGDYVDRGKQSLETICLLLA  |
| 2Mgui_PP1        | -ILLELEAPIKICGDIHGQYYDLLRLFEYGGFPPEANYLFLGDYVDRGKQSLETICLLLA  |
| 2DEHA_Glc7       | -ILLELEAPIKICGDIHGQYYDLLRLFEYGGFPPEANYLFLGDYVDRGKQSLETICLLLA  |
| 2Mfar_PP1        | -ILLELEAPIKICGDIHGQYYDLLRLFEYGGFPPEANYLFLGDYVDRGKQSLETICLLLA  |
| 2Ct_Glc7         | -ILLELEAPIKICGDIHGQYYDLLRLFEYGGFPPEANYLFLGDYVDRGKQSLETICLLLA  |
| 2Cgla_Glc7       | -ILLELEAPIKICGDIHGQYYDLLRLFEYGGFPPEsNYLFLGDYVDRGKQSLETICLLLA  |
| 2Ca_Glc7         | -ILLELEAPIKICGDIHGQYYDLLRLFEYGGFPPEANYLFLGDYVDRGKQSLETICLLLA  |
| 2Cdub_PP1        | -ILLELEAPIKICGDIHGQYYDLLRLFEYGGFPPEANYLFLGDYVDRGKQSLETICLLLA  |
| 2Klac_PP1        | -ILLELEAPIKICGDIHGQYYDLLRLFEYGGFPPEsNYLFLGDYVDRGKQSLETICLLLA  |
| 2Lther_Glc7      | -ILLELEAPIKICGDIHGQYYDLLRLFEYGGFPPEsNYLFLGDYVDRGKQSLETICLLLA  |
| 2Ag_PP1          | -ILLELEAPIKICGDIHGQYYDLLRLFEYGGFPPEsNYLFLGDYVDRGKQSLETICLLLA  |
| 2Ecym_Glc7       | -ILLELEAPIKICGDIHGQYYDLLRLFEYGGFPPEsNYLFLGDYVDRGKQSLETICLLLA  |
| 2Tbla_PP1        | -ILLELEAPIKICGDIHGQYYDLLRLFEYGGFPPEsNYLFLGDYVDRGKQSLETICLLLA  |
| 2Tdel_PP1        | -ILLELEAPIKICGDIHGQYYDLLRLFEYGGFPPEsNYLFLGDYVDRGKQSLETICLLLA  |
| 2Sc_Glc7         | -ILLELEAPIKICGDIHGQYYDLLRLFEYGGFPPEsNYLFLGDYVDRGKQSLETICLLLA  |
| 1Tmel_Glc7       | -ILLELEAPIKICGDIHGQYYDLLRLFEYGGFPPEANYLFLGDYVDRGKQSLETICLLLA  |
| 1Bcin_PP1-A      | -ILLELEAPIKICGDIHGQYYDLLRLFEYGGFPPEANYLFLGDYVDRGKQSLETICLLLA  |
| 1Nc_PP1          | -ILLELEAPIKICGDIHGQYYDLLRLFEYGGFPPEANYLFLGDYVDRGKQSLETICLLLA  |
| 1Mthe_PP1        | -ILLELEAPIKICGDIHGQYYDLLRLFEYGGFPPEANYLFLGDYVDRGKQSLETICLLLA  |
| 1Bbas_PP1        | -ILLELEAPIKICGDIHGQYYDLLRLFEYGGFPPEANYLFLGDYVDRGKQSLETICLLLA  |
| 1Anam_PP1        | -ILLELEAPIKICGDIHGQYYDLLRLFEYGGFPPEANYLFLGDYVDRGKQSLETICLLLA  |
| 1Npar_PP1        | -ILLELEAPIKICGDIHGQYYDLLRLFEYGGFPPEANYLFLGDYVDRGKQSLETICLLLA  |
| 1Bory_Glc7       | -ILLELEAPIKICGDIHGQYYDLLRLFEYGGFPPEANYLFLGDYVDRGKQSLETICLLLA  |
| 1Uree_PP1        | -ILLELEAPIKICGDIHGQYYDLLRLFEYGGFPPEANYLFLGDYVDRGKQSLETICLLLA  |
| 1Tver_PP1        | -ILLELEAPIK-----YYDLLRLFEYGGFPPEANYLFLGDYVDRGKQSLETICLLLA     |
| 1Anid_Glc7       | -ILLELEAPIKICGDIHGQYYDLLRLFEYGGFPPEANYLFLGDYVDRGKQSLETICLLLA  |
| 1Aory_Glc7       | -ILLELEAPIKICGDvHGQYYDLLRLFEYGGYPPDANYLFLGDYVDRGKQSVeICLLLA   |
| 1Af_PP1          | -ILLELEAPIKICGDIHGQYYDLLRLFEYGGFPPEANYLFLGDYVDRGKQSLETICLLLA  |
| 3Sp_PP1-1        | -ILLELEAPLKICGDIHGQYYDLLRLFEYGGFPPEANYLFLGDYVDRGKQSLevICLLLA  |
| 3Sp_PP1-2        | -ILLELEAPLKICGDIHGQYsDLLRLFEYGGYPPDANYLFLGDYVDRGKQSLevICLLfA  |
| 3Sj_PP1          | -ILLELEAPLKICGDIHGQYYDLLRLFEYGGFPPEANYLFLGDYVDRGKQSLETICLLLA  |
| 3Sj_Sds21        | -ILLELEAPLKICGDIHGQYhDLLRLFEYGGFPDANYLFLGDYVDRGKQSLETICLLfA   |
| 3Scot_PP1        | -ILLELEAPLKICGDIHGQYYDLLRLFEYGGFPPEANYLFLGDYVDRGKQSLevICLLLA  |
| 3Scot_Sds21      | -ILLELEAPLKICGDIHGQYsDLLRLFEYGGFPDANYLFLGDYVDRGKQSLevICLLfA   |
| 3Scry_PP1        | -ILLELEAPLKICGDIHGQYYDLLRLFEYGGFPPEANYLFLGDYVDRGKQSLevICLLLA  |
| 3Scry_Sds21      | -ILLELEAPLKvCGDIHGQYsDLLRLFEYGGFPDNYLFLGDYVDRGKQSLevICLLfA    |
| 3Plac_PP1        | -ILLELEAPIKICGDIHGQYYDLLRLFEYGGFPPEANYLFLGDYVDRGKQSLETICLLLA  |
| 3Pjir_PP1        | -ILLELEAPIKICGDIHGQYYDLLRLFEYGGFPPEANYLFLGDYVDRGKQSLETICLLLA  |
| 3Nirr_PP1        | -ILLELEAPIKICGDIHGQYYDLLRLFEYGGFPPEANYLFLGDYVDRGKQSLETICLLLA  |
| 4GALMADRAFT_Glc7 | -ILLELEAPIKICGDIHGQYYDLLRLFEYGGFPPEANYLFLGDYVDRGKQSLETICLLLA  |
| 4PILCRDRAFT_Glc7 | -ILLELEAPIKICGDIHGQYYDLLRLFEYGGFPPEANYLFLGDYVDRGKQSLETICLLLA  |
| 4Shir_Glc7       | -ILLELEAPIKICGDIHGQYYDLLRLFEYGGFPPEANYLFLGDYVDRGKQSLETICLLLA  |
| 4Sver_PP1        | -ILLELEAPIKICGDIHGQYYDLLRLFEYGGFPPEANYLFLGDYVDRGKQSLETICLLLA  |
| 4Pgig_PP1        | -ILLELEAPIKICGDIHGQYYDLLRLFEYGGFPPEANYLFLGDYVDRGKQSLETICLLLA  |
| 4Bbot_PP1        | -ILLELEAPIKICGDIHGQYYDLLRLFEYGGFPPEANYLFLGDYVDRGKQSLETICLLLA  |
| 4Cvis_PP1-A      | -ILLELEAPIKICGDIHGQYYDLLRLFEYGGFPPEANYLFLGDYVDRGKQSLETICLLLA  |
| 4Cvis_PP1-B      | -ILLELEAPIKICGDIHGQYYDLLRLFEYGGFPPEANYLFLGDYVDRGKQSLETICLLfA  |
| 4Cgat_PP1        | -ILLELEAPIKICGDIHGQYYDLLRLFEYGGFPPEANYLFLGDYVDRGKQSLETICLLLA  |
| 4Cneo_PP1        | -ILLELEAPIKICGDIHGQYYDLLRLFEYGGFPPEANYLFLGDYVDRGKQSLETICLLLA  |
| 4Tmes_PP1        | -ILLELEAPIKICGDIHGQYYDLLRLFEYGGFPPEANYLFLGDYVDRGKQSLETICLLLA  |
| 4Umay_Glc7       | -ILLELEAPIKICGDIHGQYYDLLRLFEYGGFPPEANYLFLGDYVDRGKQSLETICLLLA  |
| 4Phub_PP1        | -ILLELEAPIKICGDIHGQYYDLLRLFEYGGFPPEANYLFLGDYVDRGKQSLETICLLLA  |
| 5Wich_Glc7       | -ILLELEAPIKICGDIHGQYYDLLRLFEYGGFPPEANYLFLGDYVDRGKQSLETICLLLA  |
| 5Rgra_PP1        | -ILLELEAPIKICGDIHGQYYDLLRLFEYGGFPPEANYLFLGDYVDRGKQSLETICLLLA  |
| 5Pgra_PP1        | -ILLELEAPIKICGDIHGQYYDLLRLFEYGGFPPEANYLFLGDYVDRGKQSLETICLLLA  |
| 6Rdel_PP1        | -ILLDLEAPIKICGDIHGQYYDLLRLFEYGGFPPEsNYLFLMGDYVDRGKQSLETICLLLA |
| 6Ccor_PP1        | -ILLELEAPIKICGDIHGQYYDLLRLFEYGGFPPEANYLFLGDYVDRGKQSLETICLLLA  |
| 6Crev_PP1        | -vILLELEAPIKICGDIHGQYYDLLRLFEYGGFPPEANYLFLGDYVDRGKQSLETICLLLA |
| 6Spun_PP1        | -ILLELEAPIKICGDIHGQYYDLLRLFEYGGFPPEANYLFLGDYVDRGKQSLETICLLLA  |
| 6Gpro_PP1-A      | -ILLELEAPIKICGDIHGQYYDLLRLFEYGGFPPEANYLFLGDYVDRGKQSLETICLLLA  |
| 6Gpro_PP1-B      | -vLLDLEAPIKICGDIHGQYYDLLRLFEYGGFPPEsNYLFLGDYVDRGKQSLETIsLLLA  |
| 6AMAG_PP1-A      | -ILLELEAPIKICGDIHGQYYDLLRLFEYGGFPPEANYLFLGDYVDRGKQSLETICLLLA  |
| 6Rallo_PP1       | -tLLELDAPKICGDIHGQYFDLLRLFEYGGFPPEANYLFLGDYVDRGKQSLETICLLLA   |

|                  | .....10.....20.....30.....40.....50.....60                    |
|------------------|---------------------------------------------------------------|
| 2YALI_Ppz1       | -tLLELlpPVKIVGDVHGQFgDLIRFdmCGFPpaaNYLFLGDYVDRGKQSLETILLLLC   |
| 2Mgui_Ppz1       | -sLLELspPVKVVDVHGQYgDLIRVftkCGFPPltNYLFLGDYVDRGKQSLETILLLLC   |
| 2DEHA_Ppz1       | -sLLELspPVKVVDVHGQYgDLIRIftkCGFPpqtNYLFLGDYVDRGKQSLETILLLLC   |
| 2Mfar_Ppz        | -sLLELspPVKVVDVHGQYgDLIRVftkCGFPpqtNYLFLGDYVDRGKQSLETILLLLC   |
| 2Ct_Ppz1         | -sLLELspPVKVVDVHGQYlDLIRIFskCGFPpktNYLFLGDYVDRGKQSLETILLLLC   |
| 2Cgla_Ppz1       | -aLLELsaPVKIVGDIHGQFgDLRLRfktCGFPpssNFLFLGDYVDRGKQSLETILLLLC  |
| 2Cgla_Ppz2       | -aLLELspsVKIVGDVHGQYgDLRLRfktCGFPpmaNYLFLGDYVDRGKQSLETILLLLC  |
| 2Ca_Ppz1         | -sLLELapPVKVVDVHGQYhDLIRIFskCGFPpktNYLFLGDYVDRGKQSLETILLLLC   |
| 2Cdub_Ppz        | -sLLELapPVKVVDVHGQYhDLIRIFskCGFPpktNYLFLGDYVDRGKQSLETILLLLC   |
| 2Klac_PpzA       | -sLLELspPVKIVGDVHGQYadLLRLRfktCGFPpsaNYLFLGDYVDRGKQSLETILLLLC |
| 2Klac_PpzB       | -sLLELspPVKIVGDVHGQYadLLRLRfktCGFPpsaNYLFLGDYVDRGKQSLETILLLLC |
| 2Lther_Ppz1      | -sLLELspPVKIVGDVHGQYadLLRLRfktCGFPpsaNYLFLGDYVDRGKQSLETILLLLC |
| 2Ag_Ppz          | -sLLELspPVKIVGDVHGQYadLLRLRfktCGFPpssNYLFLGDYVDRGKQSLETILLLLC |
| 2Ecym_Ppz        | -sLLELspPVKIVGDVHGQYadLLRLRfktCGFPpssNYLFLGDYVDRGKQSLETILLLLC |
| 2Tbla_PpzA       | -sLLELssPVKIVGDVHGQYgDLRLRfktCGFPpaaNYLFLGDYVDRGKQSLETILLLLfC |
| 2Tdel_PpzA       | -sLLELspPVKIVGDVHGQYadLLRLRfktCGFPpsaNFLFLGDYVDRGKQSLETILLLLC |
| <b>2Sc_PPZ1</b>  | -sLLELspPVKIVGDVHGQYgDLRLRfktCGFPpssNYLFLGDYVDRGKQSLETILLLLfC |
| 2Sc_PPZ2         | -aLLELspsVKIVGDVHGQYadLLRLRfktCGFPpmaNYLFLGDYVDRGKQSLETILLLLC |
| 1Tmel_Ppz1       | -aLVELspPVKIVGDVHGQYtDLIRMFemCGFPpnaNYLFLGDYVDRGKQSLETILLLLC  |
| 1Bcin_Ppz        | -pLLELeaPVKIVGDIHGQYsDLIRMFemCGFPpssNFLFLGDYVDRGKQSLETILLLLC  |
| 1Nc_PP-Z         | -aLLELdaPVKIVGDVHGQYtDLIRMFemCGFPpnsNYLFLGDYVDRGKQSLETILLLLMC |
| 1Mthe_Ppz        | -aLLELdaPVKIVGDVHGQYtDLIRMFemCGFPpksNYLFLGDYVDRGKQSLETILLLLC  |
| 1Bbas_Ppz        | -aLLELdaPVKVVDVHGQYtDLIRMFemCGFPpmaNYLFLGDYVDRGKQSLETILLLLC   |
| 1Anam_Ppz        | -aLLELapaVKIVGDVHGQYtDLIRMFemCGFPpnsNYLFLGDYVDRGKQSLETILLLLC  |
| 1Npar_Ppz1       | -aLLELspPVKIVGDVHGQYtDLIRMFemCGFPpssNYLFLGDYVDRGKQSLETILLLLC  |
| 1Bory_Ppz1       | -aLLELaaPVKIVGDIHGQYtDLIRMFemCGFPpnsNYLFLGDYVDRGKQSLETILLLLC  |
| 1Uree_Ppz        | -aLVELaaPVKIVGDVHGQYtDLIRMFemCGFPpasNYLFLGDYVDRGKQSLETILLLLC  |
| 1Tver_Ppz        | -aLLELsaPVKIVGDVHGQYtDLIRLFemCGFPpnsNYLFLGDYVDRGKQSLETILLLLC  |
| 1Anid_Ppz1       | -aLLELsaPVKIVGDVHGQYtDLIRLFemCGFPpvsNYLFLGDYVDRGKQSLETILLLLC  |
| 1Aory_Ppz1       | -aLLELsaPVKIVGDVHGQYtDLIRLFemCGFPpssNYLFLGDYVDRGKQSLETILLLLC  |
| 1Af_PPZ          | -aLLELsaPVKIVGDVHGQYtDLIRLFemCGFPpasNYLFLGDYVDRGKQSLETILLLLC  |
| 3Sp_PPZ          | -tLLELtpPVKIVGDVHGQYsDLIRLFemCGFPpssNYLFLGDYVDRGKQSLETILLLLf1 |
| 3Sj_Pzh1         | -tLLELmpPVKIVGDVHGQYsDLIRLFemCGFPpssNYLFLGDYVDRGKQSLETILLLLl1 |
| 3Soct_Ppz        | -tfLELmpPVKIVGDVHGQYsDLIRLFemCGFPpssNYLFLGDYVDRGKQSLETILLLLf1 |
| 3Scry_Ppz        | -tfLELmpPVKIVGDVHGQYsDLIRLFemCGFPpssNYLFLGDYVDRGKQSLETILLLLf1 |
| 3Plac_Ppz        | -aLLELsaPVKIVGDIHGQFtDLIRLFemCGFPpsaNYLFLGDYVDRGKQSLETILLLLm1 |
| 3Pjir_PPZ-A      | -aLLELsaPVKIVGDIHGQFtDLIRLFemCGFPpsaNYLFLGDYVDRGKQSLETILLLLm1 |
| 3Nirr_PP-Z       | -aLLELapPlKIVGDVHGQYsDLIRLFemCGYPPsaNYLFLGDYVDRGKQSLETILLLLC  |
| 4GALMADRAFT_Ppz1 | -tLVELspPVKIVGDVHGQYsDLIRLFemCGFPpaaNYLFLGDYVDRGKQSLETILLLLC  |
| 4PILCRDRAFT_Ppz1 | -tLVELspPVKIVGDVHGQYsDLIRLFemCGFPpaaNYLFLGDYVDRGKQSLETILLLLC  |
| 4Shir_Ppz        | -tLIELspPVKIVGDVHGQYsDLIRLFemCGFPpaaNYLFLGDYVDRGKQSLETILLLLC  |
| 4Sver_PPZ        | -tLIELspPVKIVGDVHGQYsDLIRLFemCGFPpsaNYLFLGDYVDRGKQSLETILLLLC  |
| 4Pgig_PPZ        | -tLIELspPVKIVGDVHGQYsDLIRLFemCGFPpaaNYLFLGDYVDRGKQSLETILLLLC  |
| 4Bbot_PPZ        | -tLIELspPVKIVGDVHGQYsDLIRLFemCGFPpssNYLFLGDYVDRGKQSLETILLLLC  |
| 4Cvis_PPZ        | -tLIELspPVKIVGDVHGQYadLLIRLFemCGFPpaaNYLFLGDYVDRGKQSLETILLLLC |
| 4Cgat_PPZ        | -tLIELspPVKIVGDVHGQYadLLIRMFemCGFPpaaNYLFLGDYVDRGKQSLETILLLLC |
| 4Cneo_PPZ        | -tLIELspPVKIVGDVHGQYadLLIRMFemCGFPpaaNYLFLGDYVDRGKQSLETILLLLC |
| 4Tmes_PPZ        | -tLIELspPVKIVGDVHGQYadLLIRMFemCGFPpqaNYLFLGDYVDRGKQSLETILLLLC |
| 4Umay_PPZ        | -tLIELspPVKIVGDtHGQYhDLRLRFemCGFPpsaNYLFLGDYVDRGKQSLETILLLLC  |
| 4Phub_PPZ        | -tLIELspPVKIVGDtHGQYhDLRLRFemCGFPpsaNYLFLGDYVDRGKQSLETILLLLC  |
| 5Wich_PP-Z       | -tLIELnpPVKIVGDVHGQYsDLIRLFdmsGFPPqsNYLFLGDYVDRGKQSLETILLLLC  |
| 5Rgra_PPZ1       | -tLVELspPVKIVGDVHGQYsDLIRLFemCGFPpnaNYLFLGDYVDRGKQSLETILLLLC  |
| 5Pgra_PPZ        | -tLIELspPVKIVGDVHGQYsDLIRLFemCGFPpmaNYLFLGDYVDRGKQSLETILLLLC  |
| 6Rdel_PPZ-A      | -sLLELspPVKVVDtHGQYtDLIRLFemgGFPPtsNYLFLGDYVDRGKQSLETILLLLfC  |
| 6Rdel_PPZ-B      | -----gYPPdsNYLFLGDYVDRGKQSLETILLLLfC                          |
| Rdel_PPZ-C       | -vdLy-----Wnfhl1LFemgGFPPssNYLFLGDYVDRGKQSLETILLLLfC          |
| 6Rdel_PPZ-D      | ksLLELsaPVKIVGDtHGQYtDLRLRFdmGFPpssNYLFLGDYVDRGKQSLETfLLLLC   |
| 6Rdel_PPZ-E      | -aLLQLnpGVKVaGDIHGQFfDLIRLFqmCGYPPstNYLFLGDYVDRGmySLETILLLLC  |
| 6Rdel_PPZ-F      | -----mCGYPPstNYLFLGDYVDRGmySLETILLLLC                         |
| 6Rdel_PPZ-G      | -sLLELspPVKVVDtHGQYtDLIRLFemgGFPPtsNYLFLGDYVDRGKQSLETILLLLfC  |
| 6Ccor_PPZ        | -tLIELsaPVKIVGDVHGQYtDLIRLFemCGYPPnaNYLFLGDYVDRGRQSLETILLLLC  |
| 6Crev_PPZ        | -tLLQLaaPVKIItGDIHGQYtDLRLRFdkCGYPPhcNYLFLGDYVDRGKQSLETMLLLMC |
| 6Spun_PPZ        | -iLLELlpPVnIVGapcqvfifta-ssttfCeYstfaDiL-----                 |
| 6Gpro_PPZ        | lleLNphpsltIcGDIHGQFfDLRLRfdlmGYPPttNYLFLGDYVDRGKQSLETILLLLfC |
| 6AMAG_PPZ-A      | -aLIELlpPVKIVGDtHGQYsDLIRLFamsGFPPqaNYLFLGDYVDRGKQSLETILLLLC  |
| 6AMAG_PPZ-B      | -----HsrFl--ayattkrstsGqaNYLFLGDYVDRGKQSLETILLLLC             |
| 6Rallo_Ppz1      | -sLLQIepPVKIVGDIHGQYlDLInIFdqCGhPsvqpYFLGDYVDRGKQSLETMIllLC   |

Consensus PP1  
consensus Ppz

iLLeLeAPikicgdiHgqYyDLLRLFYEGGFPeaNYLFLGDYVDRGKQSLETIcLLlA  
llel pvkivgdvhgqy dlirllf cgfpp nyLflgdyvdrGKqsletillllc

|                  | .....10.....20.....30.....40.....50.....60                   |
|------------------|--------------------------------------------------------------|
| 2YaLi_Glc7       | YKIKYPENFFILRGNHECASIN---RIYGFYDEC-----KRRYNIKLWKTf          |
| 2Mgui_PP1        | YKIKYPENFFILRGNHECASIN---RIYGFYDEC-----KRRYNIKLWKTf          |
| 2DEHA_Glc7       | YKIKYPENFFILRGNHECASIN---RIYGFYDEC-----KRRYNIKLWKTf          |
| 2Mfar_PP1        | YKIKYPENFFILRGNHECASIN---RIYGFYDEC-----KRRYNIKLWKTf          |
| 2Ct_Glc7         | YKIKYPENFFILRGNHECASIN---RIYGFYDEC-----KRRYNIKLWKTf          |
| 2Cgla_Glc7       | YKIKYPENFFILRGNHECASIN---RIYGFYDEC-----KRRYNIKLWKTf          |
| 2Ca_Glc7         | YKIKYPENFFILRGNHECASIN---RIYGFYDEC-----KRRYNIKLWKTf          |
| 2Cdub_PP1        | YKIKYPENFFILRGNHECASIN---RIYGFYDEC-----KRRYNIKLWKTf          |
| 2Klac_PP1        | YKIKYPENFFILRGNHECASIN---RIYGFYDEC-----KRRYNIKLWKTf          |
| 2Lther_Glc7      | YKIKYPENFFILRGNHECASIN---RIYGFYDEC-----KRRYNIKLWKTf          |
| 2Ag_PP1          | YKIKYPENFFILRGNHECASIN---RIYGFYDEC-----KRRYNIKLWKTf          |
| 2Ecym_Glc7       | YKIKYPENFFILRGNHECASIN---RIYGFYDEC-----KRRYNIKLWKTf          |
| 2Tbla_PP1        | YKIKYPENFFILRGNHECASIN---RIYGFYDEC-----KRRYNIKLWKTf          |
| 2Tdel_PP1        | YKIKYPENFFILRGNHECASIN---RIYGFYDEC-----KRRYNIKLWKTf          |
| 2Sc_Glc7         | YKIKYPENFFILRGNHECASIN---RIYGFYDEC-----KRRYNIKLWKTf          |
| 1Tmel_Glc7       | YKIKYPENFFILRGNHECASIN---RIYGFYDEC-----KRRYNIKLWKTf          |
| 1Bcin_PP1-A      | YKIKYPENFFILRGNHECASIN---RIYGFYDEC-----KRRYNIKLWKTf          |
| 1Nc_PP1          | YKIKYPENFFILRGNHECASIN---RIYGFYDEC-----KRRYNIKLWKTf          |
| 1Mthe_PP1        | YKIKYPENFFILRGNHECASIN---RIYGFYDEC-----KRRYNIKLWKTf          |
| 1Bbas_PP1        | YKIKYPENFFILRGNHECASIN---RIYGFYDEC-----KRRYNIKLWKTf          |
| 1Anam_PP1        | YKIKYPENFFILRGNHECASIN---RIYGFYDEC-----KRRYNIKLWKTf          |
| 1Npar_PP1        | YKIKYPENFFILRGNHECASIN---RIYGFYDEC-----KRRYNIKLWKTf          |
| 1Bory_Glc7       | YKIKYPENFFvLRGNHECASIN---RIYGFYDEC-----KRRYNIKLWKTf          |
| 1Uree_PP1        | YKIKYPENFFvLRGNHECASIN---RIYGFYDEC-----KRRYNIKLWKTf          |
| 1Tver_PP1        | YKIKYPENFFvLRGNHECASIN---RIYGFYDEC-----KRRYNIKLWKTf          |
| 1Anid_Glc7       | YKIKYPENFFvLRGNHECASIN---RIYGFYDEC-----KRRYNIKLWKTf          |
| 1Aory_Glc7       | YKIKYPENFFILRGNHECASIN---RIYGFYDEC-----KRRYNIKLWKTf          |
| 1Af_PP1          | YKIKYPENFFvLRGNHECASIN---RIYGFYDEC-----KRRYNIKLWKTf          |
| 3Sp_PP1-1        | YKIKYPENFFILRGNHECASIN---RIYGFYDEC-----KRRYNIKLWKTf          |
| 3Sp_PP1-2        | YKIKYPENFFILRGNHEfASIN---RIYGFYDEC-----KRRYsIKLWKTf          |
| 3Sj_PP1          | YKIKYPENFFILRGNHECASIN---RIYGFYDEC-----KRRYNIKLWKTf          |
| 3Sj_Sds21        | YKIKYPENFFILRGNHEsAaIN---RIYGFYDEC-----KRRYsIKLWKqF          |
| 3Scot_PP1        | YKIKYPENFFILRGNHECASIN---RIYGFYDEC-----KRRYNIKLWKTf          |
| 3Scot_Sds21      | FKIKYPENFFILRGNHECASIN---RIYGFYDEC-----KRRYNIKLWkvF          |
| 3Scry_PP1        | YKIKYPENFFILRGNHECASIN---RIYGFYDEC-----KRRYNIKLWKTf          |
| 3Scry_Sds21      | FKIKYPENFFILRGNHECASIN---RIYGFYDEC-----KRRYNIKLWkiF          |
| 3Plac_PP1        | YKIKYPENFFILRGNHECASIN---RIYGFYDEC-----KRRYNIKLWKTf          |
| 3Pjir_PP1        | YKIKYPENFFILRGNHECASIN---RIYGFYDEC-----KRRYNIKLWKTf          |
| 3Nirr_PP1        | YKIKYPENFFILRGNHECASIN---RIYGFYDECiip-gfldtyvagKRRYNIKLWKTf  |
| 4GALMADRAFT_Glc7 | YKIKYPENFFILRGNHECASIN---RIYGFYDEC-----KRRYNIKLWKTf          |
| 4PILCRDRAFT_Glc7 | YKIKYPENFFILRGNHECASIN---RIYGFYDEC-----KRRYNIKLWKTf          |
| 4Shir_Glc7       | YKIKYPENFFILRGNHECASIN---RIYGFYDEC-----KRRYNIKLWKTf          |
| 4Sver_PP1        | YKIKYPENFFILRGNHECASIN---RIYGFYDEC-----KRRYNIKLWKTf          |
| 4Pgig_PP1        | YKIKYPENFFvLRGNHECASIN---RIYGFYDEC-----KRRYNIKLWKTf          |
| 4Bbot_PP1        | YKIKYPENFFILRGNHECASIN---RIYGFYDEC-----KRRYNIKLWKTf          |
| 4Cvis_PP1-A      | YKIKYPENFFILRGNHECASIN---RIYGFYDEC-----KRRYNIKLWKTf          |
| 4Cvis_PP1-B      | YKIKYPENFFMLRGNHEaASIN---RIYGFYDEC-----KRRYNIKLWkiF          |
| 4Cgat_PP1        | YKIKYPENFFILRGNHECASIN---RIYGFYDEC-----KRRYNIKLWKTf          |
| 4Cneo_PP1        | YKIKYPENFFILRGNHECASIN---RIYGFYDEC-----KRRYNIKLWKTf          |
| 4Tmes_PP1        | YKIKYPENFFILRGNHECASIN---RIYGFYDEC-----KRRYNIKLWKTf          |
| 4Umay_Glc7       | YKIKYPENFFILRGNHECASIN---RIYGFYDEC-----KRRYNIKLWKTf          |
| 4Phub_PP1        | YKIKYPENFFILRGNHECASIN---RIYGFYDEC-----KRRYNIKLWKTf          |
| 5Wich_Glc7       | YKIKYPENFFILRGNHECASIN---RIYGFYDEC-----KRRYNIKLWKTf          |
| 5Rgra_PP1        | YKIKYPENFFILRGNHECASIN---RIYGFYDEC-----KRRYNIKLWKTf          |
| 5Pgra_PP1        | YKIKYPENFFILRGNHECASIN---RIYGFYDEC-----KRRYNIKLWKTf          |
| 6Rdel_PP1        | YKIKYPENFFILRGNHECASIN---RIYGFYDEC-----KRRYNIKLWKTf          |
| 6Ccor_PP1        | YKIKYPENFFILRGNHECASIN---RIYGFYDEC-----KRRYNIKLWkiF          |
| 6Crev_PP1        | YKIKYPENFFvLRGNHEsAcIN---RIYGFYDEC-----KRRYNIKLWKTf          |
| 6Spun_PP1        | YKIKYPENFFvLRGNHECASIN---RIYGFYDEC-----KRRYNIKLWKTf          |
| 6Gpro_PP1-A      | YKIKYPENFFILRGNHECASIN---RIYGFYDEC-----KRRYNIKLWKTf          |
| 6Gpro_PP1-B      | YKIKYPENFFILRGNHEsASIN---RIYGFYDEC-----KRRYsIsLWKTf          |
| 6AMAG_PP1-A      | YKIKYPENFFILRGNHECASIN---RIYGFYDECaftvgllrlrrierKRRYNIKLWKTf |
| 6Rallo_PP1       | YKIKYPENFFILRGNHECASIN---RIYGFYDEC-----KRRYNIKLWKTf          |

|                      | .....10.....20.....30.....40.....50.....60           |
|----------------------|------------------------------------------------------|
| 2YALI_Ppz1           | YKIKYPENFFILRGNHECAkVT---RVYGFYDEC-----KRRcNIKtWKtF  |
| 2Mgui_Ppz1           | YKIKYPENFFLLRGNHEsANVT---RVYGFYDEC-----KRRcsIKiWklF  |
| 2DEHA_Ppz1           | YKIKYPENFFLLRGNHECANVT---RVYGFYDEC-----KRRcNIKtWKlF  |
| 2Mfar_Ppz            | YKIKYPENFFLLRGNHECANVT---RVYGFYDEC-----KRRcNIKtWKlF  |
| 2Ct_Ppz1             | YKIKYPENFFLLRGNHECANVT---RVYGFYDEC-----KRRcNIKtWKlF  |
| 2Cgla_Ppz1           | YKIKYPENFFLLRGNHECANVT---RVYGFYDEC-----KRRcNIKiWkyF  |
| 2Cgla_Ppz2           | YKIKYPENFFLLRGNHECANVT---RVYGFYDEC-----KRRcNIKtWKtF  |
| 2Ca_Ppz1             | YKIKYPENFFLLRGNHECANVT---RVYGFYDEC-----KRRcNIKtWKlF  |
| 2Cdub_Ppz            | YKIKYPENFFLLRGNHECANVT---RVYGFYDEC-----KRRcNIKtWKlF  |
| 2Klac_PpzA           | YKIKYPENFFLLRGNHECANVT---RVYGFYDEC-----KRRcNIKtWKtF  |
| 2Klac_PpzB           | YKIKYPENFFLLRGNHECANVT---RVYGFYDEC-----KRRcNIKtWKtF  |
| 2Lther_Ppz1          | YKIKYPENFFLLRGNHECANVT---RVYGFYDEC-----KRRcNIKtWKiF  |
| 2Ag_Ppz              | YKIKYPENFFLLRGNHECANVT---RVYGFYDEC-----KRRcNIKtWkl1  |
| 2Ecym_Ppz            | YKIKYPENFFLLRGNHECANVT---RVYGFYDEC-----KRRcNIKtWKvF  |
| 2Tbla_PpzA           | YKIKYPENFFLLRGNHECANVT---RVYGFYDEC-----KRRcNIKtWKvF  |
| 2Tdel_PPzA           | YKIKYPENFFLLRGNHECANVT---RVYGFYDEC-----KRRcNIKtWKiF  |
| 2Sc_PPZ1             | YKIKYPENFFLLRGNHECANVT---RVYGFYDEC-----KRRcNIKiWktF  |
| 2Sc_PPZ2             | YKIKYPENFFLLRGNHECANVT---RVYGFYDEC-----KRRcNIKiWktF  |
| 1Tmel_Ppz1           | YKIKYPENFFLLRGNHECANVT---RVYGFYDEC-----KRRctIKiWktF  |
| 1Bcin_Ppz            | YKIKYPENFFLLRGNHECANVT---RVYGFYDEC-----KRRaNVKvWktF  |
| 1Nc_PP-Z             | YKIKYPENFFLLRGNHECANVT---RVYGFYDEC-----KRRcNVKiWktF  |
| 1Mthe_Ppz            | YKIKYPENFFLLRGNHECANVT---RVYGFYDEC-----KRRcNVKiWktF  |
| 1Bbas_Ppz            | YKIKYPENFFLLRGNHECANVT---RVYGFYDEC-----KRRcNVKiWktF  |
| 1Anam_Ppz            | YKIKYPENFFLLRGNHECANVT---RVYGFYDEC-----KRRcNIKvWksF  |
| 1Npar_Ppz1           | YKIKYPENFFLLRGNHECANVT---RVYGFYDEC-----KRRcNVKvWkaF  |
| 1Bory_Ppz1           | YKIKYPENFFLLRGNHECANVT---RVYGFYDEC-----KRRcNIKvWkaF  |
| 1Uree_Ppz            | YKIKYPENFFLLRGNHECANVT---RVYGFYDEC-----KRRcNIKiWktF  |
| 1Tver_Ppz            | YKIKYPENFFLLRGNHECANVT---RVYGFYDEC-----KRRcNIKiWktF  |
| 1Anid_Ppz1           | YKIKYPENFFLLRGNHECANVT---RVYGFYDEC-----KRRcNIKiWktF  |
| 1Aory_Ppz1           | YKIKYPENFFLLRGNHECANVT---RVYGFYDEC-----KRRcNIKiWktF  |
| 1Af_PPZ              | YKIKYPENFFLLRGNHECANVT---RVYGFYDEC-----KRRcNIKiWktF  |
| 3Sp_PPZ              | YKIKYPENFFLLRGNHECANiT---RVYGFYDEC-----KRRcNIKiWktF  |
| 3Sj_Pzh1             | YKIKYPENFFLLRGNHECANiT---RVYGFYDEC-----KRRcNIKiWktF  |
| 3Soct_Ppz            | YKIKYPENFFLLRGNHECANiT---RVYGFYDEC-----KRRcNIKiWktF  |
| 3Scry_Ppz            | YKIKYPENFFLLRGNHECANiT---RVYGFYDEC-----KRRcNIKiWktF  |
| 3Plac_Ppz            | YKIKYPENFFLLRGNHECANVT---RVYGFYDEC-----KRRtNIKvWktF  |
| 3Pjir_Ppz-A          | YKIKYPENFFLLRGNHECANVT---RVYGFYDEC-----KRRtNIKvWktF  |
| 3Nirr_PP-Z           | YKIKYPENFFLLRGNHECANVT---RVYGFYDEC-----KRRtsIKtWkaF  |
| 4GALMADRAFT_Ppz1     | YKIKYPENFFLLRGNHECANVT---RVYGFYDEC-----KRRcNIKtWKtF  |
| 4PILCRDRAFT_Ppz1     | YKIKYPENFFLLRGNHECANVT---RVYGFYDEC-----KRRcNIKtWKtF  |
| 4Shir_Ppz            | YKIKYPENFFLLRGNHECANVT---RVYGFYDEC-----KRRcNIKtWKtF  |
| 4Sver_PPZ            | YKIKYPENFFLLRGNHECANVT---RVYGFYDEC-----KRRcsIKiWktF  |
| 4Pgig_PPZ            | YKIKYPENFFLLRGNHECANVT---RVYGFYDEC-----KRRcNIKtWKtF  |
| 4Bbot_PPZ            | YKIKYPENFFLLRGNHECANVT---RVYGFYDEC-----KRRcNIKiWktF  |
| 4Cvis_PPZ            | YKIKYPENFFLLRGNHECANVT---RVYGFYDEC-----KRRasLKvWktF  |
| 4Cgat_PPZ            | YKIKYPENFFLLRGNHECANVT---RVYGFYDEC-----KRRtNIKiWktF  |
| 4Cneo_PPZ            | YKIKYPENFFLLRGNHECANVT---RVYGFYDEC-----KRRtNIKiWktF  |
| 4Tmes_PPZ            | YKIKYPENFFLLRGNHECANVT---RVYGFYDEC-----KRRtNIKtWKtF  |
| 4Umay_PPZ            | YKIKYPENFFLLRGNHECANVT---RVYGFYDEC-----KRRvNIKiWktF  |
| 4Phub_PPZ            | YKIKYPENFFLLRGNHECANVT---RVYGFYDEC-----KRRvNIKiWktF  |
| 5Wich_PP-Z           | YKIKYPENFFLLRGNHECANVT---RVYGFYDEC-----KRRsNVKiWqF   |
| 5Rgra_PPZ1           | YKIKYPENFFLLRGNHECANVT---RVYGFYDEC-----KRRcNIKvWktF  |
| 5Pgra_PPZ            | YKIKYPENFFLLRGNHECANVT---RVYGFYDEC-----KRRcNIKiWktF  |
| 6Rdel_PPZ-A          | YKIKYPENFFLLRGNHECANVT---RVYGFYDEC-----KRRlsaKmWrtF  |
| 6Rdel_PPZ-B          | YKIKYPENFFLLRGNHECANVT---RVYGFYDEC-----KRRtNtKvWktF  |
| Rdel_PPZ-C           | YKIKYPENFFLLRGNHECANVTrgnytVYGFYDEC-----KRRlsaKmWrtF |
| 6Rdel_PPZ-D          | YKIKYPENFFILRGNHEsANVT---RVYGFYDEC-----KRRlNpKmWkiF  |
| 6Rdel_PPZ-E          | FKIKYPENFFLLRGNHEssDVT---RVYGFYDEC-----KRRlNMKmWklF  |
| 6Rdel_PPZ-F          | FKIKYPkNFFLLRGNHEsADVT---RVYGFYDEC-----KRRtDVRvWkiF  |
| 6Rdel_PPZ-G          | YKIKYPENFFLLRGNHECANVT---RVYGFYDEC-----KRRlsaKmWrtF  |
| 6Ccor_PPZ            | YKIKYPENFFLLRGNHECANVT---RVYGFYDEC-----KRRasVktWktF  |
| 6Crev_PPZ            | FKIKYPDNFFLLRGNHECAsvT---RVYGFYDEC-----KRRcsVKvWkaF  |
| 6Spun_PPZ            | -----P-----ariiy-----s-----wRRcNLKvWkvF              |
| 6Gpro_PPZ            | YKIKYPENFFILRGNHEsAsVn---RVYGFYDEC-----KRRcNVKvWkaF  |
| 6AMAG_PPZ-A          | YKIKFPgNFFLLRGNHECAgVn---RVYGFYDEC-----KRRatIKiWktF  |
| 6AMAG_PPZ-B          | YKIKFPgNFFLLRGNHECAgVn---RVYGFYDEC-----KRRatIKiWktF  |
| 6Rallo_Ppz1          | YKIKYPNtFhILRGNHECAsin---RVYGFYDEC-----KRRvNIKcWksF  |
| <b>consensus PP1</b> | <b>yKIKyPENFFiLRGNHEcAsiN RIYGFYDEC KRRyniklWktF</b> |

|                  | .....10.....20.....30.....40.....50.....60            |         |
|------------------|-------------------------------------------------------|---------|
| 2YaLi_Glc7       | TDCFNCLPIAAIIDEKIFaMHGGLSPDLNTMEQIRRVMRPTD-----       | IPDvGLL |
| 2Mgui_PP1        | TDCFNCLPIAAIIDEKIFtMHGGLSPDLNSMEQIRRVMRPTD-----       | IPDvGLL |
| 2DEHA_Glc7       | TDCFNCLPIAAIIDEKIFtMHGGLSPDLNSMEQIRRVMRPTD-----       | IPDvGLL |
| 2Mfar_PP1        | TDCFNCLPIAAIIDEKIFtMHGGLSPDLNSMEQIRRVMRPTD-----       | IPDvGLL |
| 2Ct_Glc7         | TDCFNCLPIAAIIDEKIFtMHGGLSPDLNSMEQIRRVMRPTD-----       | IPDvGLL |
| 2Cgla_Glc7       | TDCFNCLPIAAIIDEKIFcMHGGLSPDLNSMEQIRRVMRPTD-----       | IPDvGLL |
| 2Ca_Glc7         | TDCFNCLPIAAIIDEKIFtMHGGLSPDLNSMEQIRRVMRPTD-----       | IPDvGLL |
| 2Cdub_PP1        | TDCFNCLPIAAIIDEKIFtMHGGLSPDLNSMEQIRRVMRPTD-----       | IPDvGLL |
| 2Klac_PP1        | TDCFNCLPIAAIvDEKIFcMHGGLSPDLNTMEQIRRVMRPTD-----       | IPDvGLL |
| 2Lther_Glc7      | TDCFNCLPIAAIIDEKIFcMHGGLSPDLNTMEQIRRVMRPTD-----       | IPDvGLL |
| 2Ag_PP1          | TDCFNCLPIAAIIDEKIFcMHGGLSPDLNTMEQIRRVMRPTD-----       | IPDvGLL |
| 2Ecym_Glc7       | TDCFNCLPIAAIIDEKIFcMHGGLSPDLNTMEQIRRVMRPTD-----       | IPDvGLL |
| 2Tbla_PP1        | TDCFNCLPIAAIIDEKIFcMHGGLSPDLNSMEQIRRVMRPTD-----       | IPDvGLL |
| 2Tdel_PP1        | TDCFNCLPIAAIIDEKIFcMHGGLSPDLNSMEQIRRVMRPTD-----       | IPDvGLL |
| 2Sc_GLC7         | TDCFNCLPIAAIIDEKIFcMHGGLSPDLNSMEQIRRVMRPTD-----       | IPDvGLL |
| 1Tmel_Glc7       | TDCFNCLPIAAIIDEKIFtMHGGLSPDLNSMEQIRRVMRPTD-----       | IPDcGLL |
| 1Bcin_PP1-A      | TDCFNCLPIAAIIDEKIFtMHGGLSPDLNSMEQIRRVMRPTD-----       | IPDcGLL |
| 1Nc_PP1          | TDCFNCLPIAAIIDEKIFtMHGGLSPDLNSMEQIRRVMRPTD-----       | IPDcGLL |
| 1Mthe_PP1        | TDCFNCLPIAAIIDEKIFtMHGGLSPDLNSMEQIRRVMRPTD-----       | IPDcGLL |
| 1Bbas_PP1        | TDCFNCLPIAAIIDEKIFtMHGGLSPDLNSMEQIRRVMRPTD-----       | IPDcGLL |
| 1Anam_PP1        | TDCFNCLPIAAIIDEKIFtMHGGLSPDLNSMEQIRRVMRPTD-----       | IPDcGLL |
| 1Npar_PP1        | TDCFNCLPIAAIIDEKIFtMHGGLSPDLNSMEQIRRVMRPTD-----       | IPDcGLL |
| 1Bory_Glc7       | TDCFNCLPIAAIIDEKIFtMHGGLSPDLNSMEQIRRVMRPTD-----       | IPDcGLL |
| 1Uree_PP1        | TDCFNCLPIAAIIDEKIFtMHGGLSPDLNSMEQIRRVMRPTD-----       | IPDcGLL |
| 1Tver_PP1        | TDCFNCLPIAAIIDEKIFtMHGGLSPDLNSMEQIRRVMRPTDldylllsfmhg | IPDcGLL |
| 1Anid_Glc7       | TDCFNCLPIAAIIDEKIFtMHGGLSPDLNSMEQIRRVMRPTD-----       | IPDcGLL |
| 1Aory_Glc7       | iDCFNCLPIAAIvEDKIFcMHGGLSPDLNSMEQIRRIrMRPTD-----      | IPDcGLL |
| 1Af_PP1          | TDCFNCLPIAAIIDEKIFtMHGGLSPDLNSMEQIRRVMRPTD-----       | IPDcGLL |
| 3Sp_PP1-1        | TDCFNCLPIAAIIDEKIFtMHGGLSPDLNSMDQIqRiMRPTD-----       | VPDtGLL |
| 3Sp_PP1-2        | TDCFNCLPIAAAvIDEKIFcMHGGLSPDLNSLDQIqRiIRPTD-----      | IPDtGLL |
| 3Sj_PP1          | TDCFNCLPIAAIIDEKIFtMHGGLSPDLNSMDQIqRiMRPTD-----       | VPDtGLL |
| 3Sj_Sds21        | TDCFNCLPIvAvIDEKIfcMHGGLSPDLrSfdQIqqiIRPTD-----       | VPDsGLM |
| 3Scot_PP1        | TDCFNCLPIAAIIDEKIFtMHGGLSPDLNSMDQIqRiMRPTD-----       | VPDtGLL |
| 3Scot_Sds21      | TDCFNCLPIAAIvDEKIFcMHGGLSPDLNTMEQIqRiVRPTD-----       | IPDtGLL |
| 3Scry_PP1        | TDCFNCLPIAAIIDEKIFtMHGGLSPDLNSMDQIqRiMRPTD-----       | VPDtGLL |
| 3Scry_Sds21      | TDCFNCLPIAAIvDEKIFcMHGGLSPDLNaMEQIqRiIRPTD-----       | IPDtGLL |
| 3Plac_PP1        | TDCFNCLPIAAIIDEKIFtMHGGLSPDLNSMEQIRRVMRPTD-----       | VPDtGLL |
| 3Pjir_PP1        | TDCFNCLPIAAIIDEKIFtMHGGLSPDLtSMEQIRRVMRPTD-----       | VPDtGLL |
| 3Nirr_PP1        | TDCFNCLPIAAIIDEKIFtMHGGLSPDLNSMEQIRRVMRPTD-----       | VPDtGLL |
| 4GALMADRAFT_Glc7 | TDCFNCLPIAAIIDEKIFtMHGGLSPDLQSMQIRRVMRPTD-----        | VPDtGLL |
| 4PILCRDRAFT_Glc7 | TDCFNCLPIAAIIDEKIFtMHGGLSPDLQSMQIRRVMRPTD-----        | VPDtGLL |
| 4Shir_Glc7       | TDCFNCLPIAAIIDEKIFtMHGGLSPDLQSMQIRRVMRPTD-----        | VPDtGLL |
| 4Sver_PP1        | TDCFNCLPIAAIIDEKIFtMHGGLSPDLQSMQIRRVMRPTD-----        | VPDtGLL |
| 4Pgig_PP1        | TDCFNCLPIAAIIDEKIFtMHGGLSPDLQSMQIRRVMRPTD-----        | VPDtGLL |
| 4Bbot_PP1        | TDCFNCLPIAAIIDEKIFtMHGGLSPDLQSMQIRRVMRPTD-----        | VPDtGLL |
| 4Cvis_PP1-A      | TDCFNCLPIAAIIDEKIFtMHGGLSPDLQSMQIRRVMRPTD-----        | VPDtGLL |
| 4Cvis_PP1-B      | TDCFNCLPIAAALIDDKIFcMHGGLSPDLQSMQvRRVMRPTD-----       | LPDeGLL |
| 4Cgat_PP1        | TDCFNCLPIAAIIDEKIFtMHGGLSPDLQSMQIRRVMRPTD-----        | VPDtGLL |
| 4Cneo_PP1        | TDCFNCLPIAAIIDEKIFtMHGGLSPDLQSMQIRRVMRPTD-----        | VPDtGLL |
| 4Tmes_PP1        | TDCFNCLPIAAIIDEKIFtMHGGLSPDLQTIMEQIRRVMRPTD-----      | VPDtGLL |
| 4Umay_Glc7       | TDCFNCLPIAAIIDEKIFtMHGGLSPDLQSMQIRRVMRPTD-----        | VPDtGLL |
| 4Phub_PP1        | TDCFNCLPIAAIIDEKIFtMHGGLSPDLQSMQIRRVMRPTD-----        | VPDtGLL |
| 5Wich_Glc7       | TDCFNCLPIAAIIDEKIFtMHGGLSPDLQSMQIRRVMRPTD-----        | VPDtGLL |
| 5Rgra_PP1        | TDCFNCLPIAAIIDEKIFtMHGGLSPDLQSMQIRRVMRPTD-----        | VPDtGLL |
| 5Pgra_PP1        | TDCFNCLPIAAIIDEKIFtMHGGLSPDLQSMQIRRVMRPTD-----        | VPDtGLL |
| 6Rdel_PP1        | TDCFNCLPIAAALvDEKIFcMHGGLSPDLQSFQIRRVMRPTD-----       | VPDtGLL |
| 6Ccor_PP1        | TDCFNCLPIAAIIDEKIFcMHGGLSPDLtDQIRRIrMRPTD-----        | VPDmGLL |
| 6Crev_PP1        | TDCFNCLPIAAIIDEKIFsMHGGLSPDLiSMDQIKRiMRPTD-----       | VPDtGLL |
| 6Spun_PP1        | TDCFNCLPIAAIIDEKIFtMHGGLSPDLQSMQIRRVMRPTD-----        | VPDtGLL |
| 6Gpro_PP1-A      | TDCFNCLPIAAIIDEKIFtMHGGLSPDLQSMQIRRVMRPTD-----        | VPDtGLL |
| 6Gpro_PP1-B      | TDCFNCLPIAAALIEDRIllMHGGLSPDLQnLDQIRRIrMRPTE-----     | VPDaGLL |
| 6AMAG_PP1-A      | TDCFNCLPIAAIIDEKIFtMHGGLSPDLQSMQIRRVMRPTD-----        | VPDtGLL |
| 6Rallo_PP1       | TDCFNCLPIAAIIDEKIFtMHGGLSPDLQSMQIRRVMRPTD-----        | VPDtGLL |

|                      | .....10.....20.....30.....40.....50.....60                 |
|----------------------|------------------------------------------------------------|
| 2YALI_Ppz1           | VDtFNtLPIAaVVAgKIFCVHGGLSPsLssMsEIRsIvRPTD-----VPDYGLI     |
| 2Mgui_Ppz1           | IDtFNtLPIAaIVAgKIFCVHGGLSPvLnsMDEIRtIaRPTD-----VPDYGLL     |
| 2DEHA_Ppz1           | IDtFNtLPIAaIVAgKIFCVHGGLSPvLnsMEEIRnIaRPTD-----VPDFGLL     |
| 2Mfar_Ppz            | IDtFNtLPIAaIVARKIFCVHGGLSPvLnsMDEIRnIaRPTD-----VPDFGLL     |
| 2Ct_Ppz1             | IDtFNtLPIAaIVAgKIFCVHGGLSPvLnsMDEIRnIaRPTD-----VPDFGLL     |
| 2Cgla_Ppz1           | IDtFNtLPLtaIVAgKIFCVHGGLSPvLntMDEIRnMsRPTD-----VPDFGLI     |
| 2Cgla_Ppz2           | IDtFNtLPLAaIVtgKIFCVHGGLSPvLnsMDEIRhVsRPTD-----VPDFGLI     |
| 2Ca_Ppz1             | IDtFNtLPIAaIVAgKIFCVHGGLSPvLnsMDEIRnIaRPTD-----VPDFGLL     |
| 2Cdub_Ppz            | IDtFNtLPIAaIVAgKIFCVHGGLSPvLnsMDEIRnIaRPTD-----VPDFGLL     |
| 2Klac_PpzA           | IDtFNALPLAaIVAgKIFCVHGGLSPvLnsMDEIRhVsRPTD-----VPDFGLI     |
| 2Klac_PpzB           | IDtFNALPLAaIVAgKIFCVHGGLSPvLnsMDEIRhVsRPTD-----VPDFGLI     |
| 2Lther_Ppz1          | IDtFNtLPLAaIVAgKIFCVHGGLSPvLnsMDEIRhVsRPTD-----VPDFGLI     |
| 2Ag_Ppz              | IDtFNtLPLAaIVAgKIFCVHGGLSPvLnsMDEIRhVsRPTD-----VPDFGLI     |
| 2Ecym_Ppz            | IDtFNtLPLAaIVAgKIFCVHGGLSPvLnsMDEIRhVsRPTD-----VPDFGLI     |
| 2Tbla_PpzA           | IDtFNtLPLAaIVAgKIFCVHGGLSPiLnsMDEIRhVsRPTD-----VPDFGLI     |
| 2Tdel_PpzA           | VDtFNtLPLAaIVAgKfFCVHGGLSPvLnsMDEIRhVsRPTD-----VPDFGLI     |
| 2Sc_PPZ1             | IDtFNtLPLAaIVAgKIFCVHGGLSPvLnsMDEIRhVvRPTD-----VPDFGLI     |
| 2Sc_PPZ2             | VDtFNtLPLAaIVtgKIFCVHGGLSPvLnsMDEIRhVsRPTD-----VPDFGLI     |
| 1Tmel_Ppz1           | IDtFNcLPIAsIVAgKIFCVHGGLSPsLshMDDIRqIaRPTD-----VPDYGLL     |
| 1Bcin_Ppz            | VDvFNcLPIAaIVAgKIFCVHGGLSPaLshMDDIRnIaRPTD-----VPDYGLL     |
| 1Nc_PP-Z             | VDtFNcLPIAaIVAgKIFCVHGGLSPaLghMDDIRnIaRPTD-----VPDYGLL     |
| 1Mthe_Ppz            | IDtFNcLPIAaIVAAKIFCVHGGLSPaLshMDDIRnIaRPTD-----VPDYGLL     |
| 1Bbas_Ppz            | IDcFNtLPIAaIVAgKIFCVHGGLSPaLshMDDIRnIaRPTD-----VPDYGLL     |
| 1Anam_Ppz            | VDtFNcLPIAsVVAaKIFCVHGGLSPsLshMDDIRnIaRPTD-----VPDYGLL     |
| 1Npar_Ppz1           | VDtFNtLPIAaIVAgKIFCVHGGLSPsLshMDDIRqIaRPTD-----VPDYGLL     |
| 1Bory_Ppz1           | VDtFNtLPIAaIVAgKIFCVHGGLSPsLshMDDIRqIaRPTD-----VPDYGLL     |
| 1Uree_Ppz            | VDtFNcLPIAsIVAgKIFCVHGGLSPsLshMDDIRgIaRPTD-----VPDYGLL     |
| 1Tver_Ppz            | VDtFNcLPIAaIVAgKIFCVHGGLSPsLshMDDIRgIaRPTD-----VPDYGLL     |
| 1Anid_Ppz1           | VDtFNcLPIAaIVAgKIFCVHGGLSPsLshMDDIRnIaRPTD-----VPDYGLL     |
| 1Aory_Ppz1           | IDtFNcLPIAsIVAgKIFCVHGGLSPsLshMDDIRgIaRPTD-----VPDYGLL     |
| 1Af_PPZ              | IDtFNcLPIAaIVAgKIFCVHGGLSPsLshMDDIRgIaRPTD-----VPDYGLL     |
| 3Sp_PPZ              | INTFNcLPIAsVVAgKIFCVHGGLSPsLshMDDIREIpRPTD-----VPDYGLL     |
| 3Sj_Pzh1             | IDtFNcLPIAsVVAgKIFCVHGGLSPcLnsMNDIREIvRPTD-----VPDcGLL     |
| 3Soc_Ppz             | INTFNcLPIAsVVAgKIFCVHGGLSPaLssMDDIKeItRPTD-----VPDYGLL     |
| 3Scry_Ppz            | INTFNcLPIAsVVAgKIFCVHGGLSPaLssMDDIKeItRPTD-----VPDYGLL     |
| 3Plac_Ppz            | IDaFNtLPIAaVVAaKIFCVHGGLSPsLahMDEIRaItRPTD-----VPDYGLL     |
| 3Pjir_Ppz-A          | IDaFNtLPIAaVVAaKIFCVHGGLSPsLahMDEIRaItRPTD-----VPDYGLL     |
| 3Nirr_PP-Z           | IDtFNcLPIAsIVANaKIFCVHGGLSPsLhaMsEIHtInRPTD-----VPDYGLL    |
| 4GALMADRAFT_Ppz1     | IDvFNcLPIAaIVAsKIFCVHGGLSPsLhtMEDIKrIqRPTD-----VPDYGLL     |
| 4PILCDRAFT_Ppz1      | IDvFNcLPIAaIVAsKIFCVHGGLSPsLhsMDDIKrIqRPTD-----VPDYGLL     |
| 4Shir_Ppz            | IDvFNcLPIAaIVAsKIFCVHGGLSPsLqsMDDIKaLqRPTD-----VPDYGLL     |
| 4Sver_PPZ            | IDvFNcLPIAsIVAsKIFCVHGGLSPnLqsMEDIKrIaRPTD-----VPDYGLL     |
| 4Pgig_PPZ            | IDvFNcLPIAaIVAsKIFCVHGGLSPsLhhMDDIKrIqRPTD-----VPDYGLL     |
| 4Bbot_PPZ            | IDvFNcLPIAaVVAaKIFCVHGGLSPsMhsMEDIKrInRPTD-----VPDFGLL     |
| 4Cvis_PPZ            | IDvFNALPIAsIVAsKIFCVHGGLSPsLnnMDDIRrIaRPTD-----VPDYGLL     |
| 4Cgat_PPZ            | IDvFNtLPIAsIVAsKIFCVHGGLSPsLksMDDIRrIqRPTD-----VPDYGLL     |
| 4Cneo_PPZ            | IDvFNtLPIAsIVAsKIFCVHGGLSPsLksMDDIRrIqRPTD-----VPDYGLL     |
| 4Tmes_PPZ            | IDvFNtLPIAsIVAsKIFCVHGGLSPsLksMDDIRrIqRPTD-----VPDFGLL     |
| 4Umay_PPZ            | IDvFNtLPIAaVVAaKIFCVHGGLSPsLsnMDDIRrIeRPTD-----VPDYGLL     |
| 4Phub_PPZ            | IDvFNtLPIAaVVAaKIFCVHGGLSPsLsnMDDIRrIeRPTD-----VPDYGLL     |
| 5Wich_PP-Z           | VDvFNsfPIAaVVAaKIFCVHGGLSPnLttMDDIRrIqRPLD-----VPDYGLL     |
| 5Rgra_PPZ1           | IDvFNcLPIAaVVAaKIFCVHGGLSPsLssMDDIRrIsRPTD-----VPDYGLL     |
| 5Pgra_PPZ            | IDvFNcLPIsaVVAaKIFCVHGGLSPsLstMDDIRrIqRPTD-----VPDFGLL     |
| 6Rdel_PPZ-A          | VDvFNtLPIAaLVAgKIFCVHGGLSPsLhsMDEIRnIqRPTD-----VPDYGLL     |
| 6Rdel_PPZ-B          | IDaFNtLPIAaLVAsKIFCVHGGLSPsLhsMDDvRnImRPTD-----VPEYGLL     |
| Rdel_PPZ-C           | VDvFNtLPIAaLVAgKIFCVHGGLSPsLhsMDEIRnIqRPTD-----VPDYGLL     |
| 6Rdel_PPZ-D          | VDvFNtLPIAaLVAgKIFCVHGGLSPsLssMDDIRnIqRPTD-----VPDYGLL     |
| 6Rdel_PPZ-E          | cDvFNtMPIAaIiGnRIFCVHGGLSPfMksMDEInaLpRPTe-----VPEYGLL     |
| 6Rdel_PPZ-F          | cDvFNAMPIAaIVGgKIFCVHGGLSPwMksMDqIRqLpRPTe-----VPDqGLL     |
| 6Rdel_PPZ-G          | VDvFNtLPIAaLVAgKIFCVHGGLSPsLhsMDEIRnIqRPTD-----VPDYGLL     |
| 6Ccor_PPZ            | VsvFNcLPVaaVVAaKIFCVHGGLSPsLhdMDDIRqIeRPSD-----VPDYGLL     |
| 6Crev_PPZ            | VNtFNtLPVaaVVAaKIFCVHGGLSPdLlnMEqIRqLpRPcD-----VPDhGIL     |
| 6Spun_PPZ            | tDvFNcLPIAaLVAgKIFCVHGGLSPsLhsMDDIRaVaRPSD-----VPDFGLL     |
| 6Gpro_PPZ            | tDvFNcLPVaaIVAgKIFCVHGGLSPnLntMDDIRnLgRPTD-----VPDvGIL     |
| 6AMAG_PPZ-A          | IDvFDcLPIAaIVAgKIFCVHGGLSPsLdtMEEvRnLpRPTD-----VPDYGLL     |
| 6AMAG_PPZ-B          | IDvFDcLPIAaIVAgKIFCVHGGLSPsLdtMEDvRnLpRPTD-----VPDYGLL     |
| 6Rallo_Ppz1          | tDvFNvIPVaaIVAEKIFCVHGGLSPgLysMkqIemIkRPTD-----VPDFGLL     |
| <b>consensus PP1</b> | <b>tDCFNCLPiaAiidekIf MHGGLSPdLnsmeQirrvvmRPTd iPD GLI</b> |

consensus PPZ id Fn lPia iva kiFCVHGGLSP l Mddir i RPTd VPdyGll

```

.....10.....20.....30.....40.....50.....60
2YaLi_Glc7 CDLLWSDPKDITGwnENDRGVSFTFGPDVVLRFQKHDMDLICRAHQVVEDGYEFFsKR
2Mgui_PP1 CDLLWSDPKDITGwSENDRGVSFTFGPDVVSRLQKHDMDLICRAHQVVEDGYEFFsKR
2DEHA_Glc7 CDLLWSDPKDITGwSENDRGVSFTFGPDVVSRLQKHDMDLICRAHQVVEDGYEFFsKR
2Mfar_PP1 CDLLWSDPKDITGwSENDRGVSFTFGPDVVSRLQKHDMDLvCRAHQVVEDGYEFFsKR
2Ct_Glc7 CDLLWSDPKDITGwSENDRGVSFTFGPDVVSRLQKHDMDLICRAHQVVEDGYEFFsKR
2Cgla_Glc7 CDLLWSDPKDITGwSENDRGVSFTFGPDVvNRLQKqDMELICRAHQVVEDGYEFFsKR
2Ca_Glc7 CDLLWSDPKDITGwSENDRGVSFTFGPDVVSRLQKHDMDLICRAHQVVEDGYEFFsKR
2Cdub_PP1 CDLLWSDPKDITGwSENDRGVSFTFGPDVVSRLQKHDMDLICRAHQVVEDGYEFFsKR
2Klac_PP1 CDLLWSDPKDITGwSENDRGVSFTFGPDVVSRLQKqDMELICRAHQVVEDGYEFFsKR
2Lther_Glc7 CDLLWSDPKDITGwSENDRGVSFTFGPDVVSRLQKqDMELICRAHQVVEDGYEFFsKR
2Ag_PP1 CDLLWSDPKDITGwSENDRGVSFTFGPDVVSRLQKqDMELICRAHQVVEDGYEFFsKR
2Ecym_Glc7 CDLLWSDPKDITGwSENDRGVSFTFGPDVVSRLQKqDMELICRAHQVVEDGYEFFsKR
2Tbla_PP1 CDLLWSDPKDITGwSENDRGVSFTFGPDVvNRLQKqDMELICRAHQVVEDGYEFFsKR
2Tdel_PP1 CDLLWSDPKDITGwSENDRGVSFTFGPDVvNRLQKqDMELICRAHQVVEDGYEFFsKR
2Sc_Glc7 CDLLWSDPKDITGwSENDRGVSFTFGPDVvNRLQKqDMELICRAHQVVEDGYEFFsKR
1Tmel_Glc7 CDLLWSDPKDITGwSENDRGVSFTFGPDVVSRLQKHDMDLICRAHQVVEDGYEFFsKR
1Bcin_PP1-A CDLLWSDPKDITGwSENDRGVSFTFGPDVVSRLQKHDMDLICRAHQVVEDGYEFFsKR
1Nc_PP1 CDLLWSDPKDITGwSENDRGVSFTFGPDVVSRLQKHDMDLICRAHQVVEDGYEFFsKR
1Mthe_PP1 CDLLWSDPKDITGwSENDRGVSFTFGPDVVSRLQKHDMDLICRAHQVVEDGYEFFsKR
1Bbas_PP1 CDLLWSDPKDITGwSENDRGVSFTFGPDVVSRLQKHDMDLICRAHQVVEDGYEFFsKR
1Anam_PP1 CDLLWSDPKDITGwSENDRGVSFTFGPDVVSRLQKHDMDLICRAHQVVEDGYEFFsKR
1Npar_PP1 CDLLWSDPKDITGwSENDRGVSFTFGPDVVSRLQKHDMDLICRAHQVVEDGYEFFsKR
1Bory_Glc7 CDLLWSDPKDITGwSENDRGVSFTFGPDVVSRLQKHDMDLICRAHQVVEDGYEFFsKR
1Uree_PP1 CDLLWSDPKDITGwSENDRGVSFTFGPDVVSRLQKHDMDLICRAHQVVEDGYEFFsKR
1Tver_PP1 CDLLWSDPKDITGwSENDRGVSFTFGPDVVSRLQKHDMDLICRAHQVVEDGYEFFsKR
1Anid_Glc7 CDLLWSDPKDITGwSENDRGVSFTFGPDVVSRLQKHDMDLICRAHQVVEDGYEFFsKR
1Aory_Glc7 CDLLWSDPKDITGwSENDRGVSFTFGPDVvHrfvQKHDLICRAHQcVEDGYEFFaKR
1Af_PP1 CDLLWSDPKDITGwSENDRGVSFTFGPDVVSRLQKHDMDLICRAHQVVEDGYEFFsKR
3Sp_PP1-1 CDLLWSDPKDLTGwgDNDRGVSFTFGPDVVSRLhKHDMDLvCRAHQVVEDGYEFFsKR
3Sp_PP1-2 CDLLWSDPKDLTGwgDNDRGVSFTFGADVVSRFLQKHDLICRAHQVVEDGYEFFgKR
3Sj_PP1 CDLLWSDPKDLTGwgDNDRGVSFTFGPDVVSRLhKHDMDLvCRAHQVVEDGYEFFsKR
3Sj_Sds21 CDLLWSDPEgvtGWgENDRGisYvFGADVVSRFLQKHDMDLvCRAHQVVEDGYEFFcKR
3Scot_PP1 CDLLWSDPDnDLTGwgDNDRGVSFTFGPDVVSRLhKHDMDLvCRAHQVVEDGYEFFsKR
3Scot_Sds21 CDLLWSDPEKDvkgwgDNDRGVSFTFGADVVNRLQKqDMDLvCRAHQVVEDGYEFFaKR
3Scry_PP1 CDLLWSDPKDLTGwgDNDRGVSFTFGPDVVSRLhKHDMDLvCRAHQVVEDGYEFFsKR
3Scry_Sds21 CDLLWSDPEKDvTGwgDNDRGVSFTFGADVVNRLQKHDMDLICRAHQVVEDGYEFFaKR
3Plac_PP1 CDLLWSDPKDITGwSENDRGVSFTFGPDVVSRLQKHDMDLICRAHQVVEDGYEFFsKR
3Pjir_PP1 CDLLWSDPKDITGwSENDRGVSFTFGPDVVSRLQKHDMDLICRAHQVVEDGYEFFsKR
3Nirr_PP1 CDLLWSDPKDITGwSENDRGVSFTFGPDVVSRLaKHDMDLICRAHQVVEDGYEFFsKR
4GALMADRAFT_Glc7 CDLLWSDPKDITGwSENDRGVSFTFGPDVVSRLQKHDMDLICRAHQVVEDGYEFFaKR
4PILCRDRAFT_Glc7 CDLLWSDPKDITGwSENDRGVSFTFGPDVVTFLQKHDMDLICRAHQVVEDGYEFFaKR
4Shir_Glc7 CDLLWSDPKDITGwSENDRGVSFTFGPDVVSRLQKHDMDLICRAHQVVEDGYEFFaKR
4Sver_PP1 CDLLWSDPKDITGwSENDRGVSFTFGPDVVSRLQKHDMDLICRAHQVVEDGYEFFaKR
4Pgig_PP1 CDLLWSDPKDITGwSENDRGVSFTFGPDVVSRLQKHDMDLICRAHQVVEDGYEFFaKR
4Bbot_PP1 CDLLWSDPKDISGwSENDRGVSFTFGPDVVSRLQKHDMDLICRAHQVVEDGYEFFaKR
4Cvis_PP1-A CDLLWSDPKDITGwSENDRGVSFTFGPDVVSRLQKHDMDLICRAHQVVEDGYEFFaKR
4Cvis_PP1-B CDLLWADPKDITGwSpNDRGVSFTFGADVVLKFLdKHDLqLivRAHQVVEDGYEFFaKR
4Cgat_PP1 CDLLWSDPKDITGwSENDRGVSFTFGPDVVSRLQKHDMDLICRAHQVVEDGYEFFaKR
4Cneo_PP1 CDLLWSDPKDITGwSENDRGVSFTFGPDVVSRLQKHDMDLICRAHQVVEDGYEFFaKR
4Tmes_PP1 CDLLWSDPKDITGwSENDRGVSFTFGPDVVSRLQKHDMDLICRAHQVVEDGYEFFaKR
4Umay_Glc7 CDLLWSDPKDISGwSENDRGVSFTFGPDVVSRLQKHDMDLICRAHQVVEDGYEFFaKR
4Phub_PP1 CDLLWSDPKDISGwSENDRGVSFTFGPDVVSRLQKHDMDLICRAHQVVEDGYEFFaKR
5Wich_Glc7 CDLLWSDPKDISGwSENDRGVSFTFGPDVVTFLQKHDMDLICRAHQVVEDGYEFFaKR
5Rgra_PP1 CDLLWSDPKDITGwSENDRGVSFTFGPDVVSRLQKHDMDLICRAHQVVEDGYEFFaKR
5Pgra_PP1 CDLLWSDPKDITGwSENDRGVSFTFGPDVVTFLQKHDMDLICRAHQVVEDGYEFFaKR
6Rdel_PP1 CDLLWSDPKDITGwSENDRGVSFTFGPDVVSRLQKHDMDLICRAHQVVEDGYEFFsKR
6Ccor_PP1 CDLLWSDPKDITGwSENDRGVSFTFGPDVVTKFLKHDMDLICRAHQVVEDGYEFFaKR
6Crev_PP1 CDLLWSDPKDITGwSENDRGVSFTFGPDVfKFLQKHDLDLvCRAHQVVEDGYEFFaKR
6Spun_PP1 CDLLWSDPKDITGwSENDRGVSFTFGPDVVTFLQKHDLDLICRAHQVVEDGYEFFaKR
6Gpro_PP1-A CDLLWSDPKDITGwSENDRGVSFTFGPDVVSRLQKHDLDLICRAHQVVEDGYEFFaKR
6Gpro_PP1-B CDLLWSDPEADTGwENDRGaSTFGPDVvARFLrKHDLDLICRAHQVVEDGYEFFaKR
6AMAG_PP1-A CDLLWSDPKDITGwSENDRGVSFTFGPDVVTFLQKHDMDLICRAHQVVEDGYEFFaKR
6Rallo_PP1 CDLLWSDPKDITGwSENDRGVSFTFGPDVVTFLQKHDMDLICRAHQVVEDGYEFFaKR

```

|                  |                                                             |
|------------------|-------------------------------------------------------------|
|                  | .....10.....20.....30.....40.....50.....60                  |
| 2YALI_Ppz1       | NDLLWSDPaDtqnEWEDNERGVSYcFsKvaInkFLtKfsfDLVCRAHMVEDGYEFFnDR |
| 2Mgui_Ppz1       | NDLLWSDPaDtqnEWEDNERGVSYvFsRtaInkFLqKfgfDLVCRAHMVEDGYEFFnDR |
| 2DEHA_Ppz1       | NDLLWSDPaDtmnEWEDNERGVSYvFsRvaInkFLqKfgfDLVCRAHMVEDGYEFFnDR |
| 2Mfar_Ppz        | NDLLWSDPaDtinEWEDNERGVSYvFsKvaInkFLsKfgfDLVCRAHMVEDGYEFFnDR |
| 2Ct_Ppz1         | NDLLWSDPaDtinEWEDNERGVSYvFsKvaInkFLsKfnfDLVCRAHMVEDGYEFFnDR |
| 2Cgla_Ppz1       | NDLLWSDPiDspnEWEDNDRGVSYcYnKvaInkFLnKfnfDLVCRAHMVEDGYEFFnDR |
| 2Cgla_Ppz2       | NDLLWSDPtDspnEWEDNERGVSYcYnKvaInkFLnKfgfDLVCRAHMVEDGYEFFnDR |
| 2Ca_Ppz1         | NDLLWSDPaDtinEWEDNERGVSYvFsKvaInkFLsKfnfDLVCRAHMVEDGYEFFnDR |
| 2Cdub_Ppz        | NDLLWSDPaDtinEWEDNERGVSYvFsKvaInkFLsKfnfDLVCRAHMVEDGYEFFnDR |
| 2Klac_PpzA       | NDLLWSDPtDspnEWEDNERGVSYcYnKvaInkFLnKfgfDLVCRAHMVEDGYEFFnDR |
| 2Klac_PpzB       | NDLLWSDPtDspnEWEDNERGVSYcYnKvaInkFLnKfgfDLVCRAHMVEDGYEFFnDR |
| 2Lther_Ppz1      | NDLLWSDPtDspnEWEDNERGVSYcYnKvaInkFLnKfgfDLVCRAHMVEDGYEFFnDR |
| 2Ag_Ppz          | NDLLWSDPtDspnEWEDNERGVSYcYnKvaInkFLnKfgfDLVCRAHMVEDGYEFFnDR |
| 2Ecym_Ppz        | NDLLWSDPtDspnEWEDNERGVSYcYnKvaInkFLnKfgfDLVCRAHMVEDGYEFFnDR |
| 2Tbla_PpzA       | NDLLWSDPtDspnEWEDNERGVSYcYnKvaInkFLnRfgfDLVCRAHMVEDGYEFFnDR |
| 2Tdel_PPzA       | NDLLWSDPtDspnEWEDNERGVSYcYnKvaInkFLnKfgfDLVCRAHMVEDGYEFFnDR |
| 2Sc_PPZ1         | NDLLWSDPtDspnEWEDNERGVSYcYnKvaInkFLnKfgfDLVCRAHMVEDGYEFFnDR |
| 2Sc_PPZ2         | NDLLWSDPtDssnEWEDNERGVSYcYnKvaInkFLnKfgfDLVCRAHMVEDGYEFFnDR |
| 1Tmel_Ppz1       | sDLLWSDPaDmqtdWEENERGVSYcFgKkvIleFLaRhdfDLVCRAHMVEDGYEFFnDR |
| 1Bcin_Ppz        | NDLLWSDPaDqeadWEqSERGVSYsFgKkvIqeFLlRhdfDLVCRAHMVEDGYEFFegR |
| 1Nc_PP-Z         | NDLLWSDPaDmdqDWEaNERGVSYcFgKkvIsdFLathdfDLVCRAHMVEDGYEFYtDR |
| 1Mthe_Ppz        | NDLLWSDPaDmdqDWEaNERGVSYcFgKkvItDFLagndfDLVCRAHMVEDGYEFFtDR |
| 1Bbas_Ppz        | NDLLWSDPaDmeqDWEaNERGVSYcFgKrvItDFLavhdfDLICRAHMVEDGYEFFnDR |
| 1Anam_Ppz        | NDLLWSDPaDmenDWEaNERGVSYcFgKkvImeFLaKhdfDLVCRAHMVEDGYEFFtDR |
| 1Npar_Ppz1       | NDLLWSDPaDmdnDWEaNERGVSYcFgKkvImeFLqRhdfDLVCRAHMVEDGYEFFnDR |
| 1Bory_Ppz1       | NDLLWSDPaDmenDWEsNERGVSYcFgKkvImeFLaRhdfDLVCRAHMVEDGYEFFtDR |
| 1Uree_Ppz        | NDLLWSDPaDmeeDWEpNERGVSYcFgKkvImdFLqRhdfDLVCRAHMVEDGYEFFnDR |
| 1Tver_Ppz        | NDLLWSDPaDmeeDWEpNERGVSYcFgKkvImeFLqRhdfDLVCRAHMVEDGYEFFnDR |
| 1Anid_Ppz1       | NDLLWSDPaDmdeDWEpNERGVSYcFnKvImnFLqRhdfDLVCRAHMVEDGYEFYqDR  |
| 1Aory_Ppz1       | NDLLWSDPaDmeeDWEpNERGVSYcFgKkvImnFLqRhdfDLVCRAHMVEDGYEFYqDR |
| 1Af_PPZ          | NDLLWSDPaDmeeDWEpNERGVSYcFgKkvImnFLqRhdfDLVCRAHMVEDGYEFYqDR |
| 3Sp_PPZ          | NDLLWSDPaDtenDWEENERGVSYcFnKvIrqFLaKhdfDLICRAHMVEDGYEFFnDR  |
| 3Sj_Pzh1         | NDLLWSDPaDnekDWEENERGVSYcFnKvIrqFLaKfefDLICRAHMVEDGYEFFnDR  |
| 3Sot_PPz         | NDLLWSDPaDmenDWEENERGVSYcFnKvIrqFLaRhdfDLICRAHMVEDGYEFFnER  |
| 3Scry_PPz        | NDLLWSDPaDlenDWEENERGVSYcFnKvIrqFLaRhdfDLICRAHMVEDGYEFFnER  |
| 3Plac_PPz        | NDLLWSDPaDihndWEDsERGVSYcFsKvIhqFLaKhdfDLVCRAHMVEDGYEFFnDR  |
| 3Pjir_PPz-A      | NDLLWSDPaDihndWEDsERGVSYcFsKvIhqFLaKhdfDLVCRAHMVEDGYEFFnDR  |
| 3Nirr_PP-Z       | NDLLWSDPaEtkdDWEpNERGVSYcFgRnvIdsFLrRfdfDLVCRAHMVEDGYEFFnER |
| 4GALMADRAFT_PPz1 | NDLLWSDPsDtaldWEDNERGVSYcFgKaiIneFLvRydmDLICRAHMVEDGYEFWnDR |
| 4PILCRDRAFT_PPz1 | NDLLWSDPsDtaldWEDNERGVSYcFgKaiIndFLvRydmDLICRAHMVEDGYEFWnDR |
| 4Shir_PPz        | NDLLWSDPsDtavEWEDNERGVSYcFgKaiIndFLvRydmDLICRAHMVEDGYEFWnDR |
| 4Sver_PPZ        | NDLLWSDPsEtaidWEDNERGVSYcFgKsvIneFLaKwdmDLVCRAHMVEDGYEFWnDR |
| 4Pgig_PPZ        | NDLLWSDPsDtaqDWEENERGVSYcFgKsiIndFLvRydmDLICRAHMVEDGYEFWnDR |
| 4Bbot_PPZ        | NDLLWSDPsDtateWEDNERGVSYcFgKsiIneFLgRydmDLICRAHMVEDGYEFWnDR |
| 4Cvis_PPZ        | NDLLWSDPsDtaqDWEENERGVSYcFgKrvIqdFLeRydmDLVCRAHMVEDGYEFWnDR |
| 4Cgat_PPZ        | NDLvwSDPsDtaldWEDNERGVSYcYgKsvInaFLathdmDLICRAHMVEDGYEFYnDR |
| 4Cneo_PPZ        | NDLvwSDPsDtaldWEDNERGVSYcYgKsvInaFLathdmDLICRAHMVEDGYEFYnDR |
| 4Tmes_PPZ        | NDLvwSDPsDttmDWEENERGVSYcYgKsvInaFLathdmDLICRAHMVEDGYEFYnDR |
| 4Umay_PPZ        | NDLLWSDPsDtaldWEDNERGVSYcFgKavIqqFLaqydfDLICRAHMVEDGYEFWnER |
| 4Phub_PPZ        | NDLLWSDPsDtaldWEDNERGVSYcFgKavIqqFLaqydfDLICRAHMVEDGYEFWnER |
| 5Wich_PP-Z       | NDLLWSDPsDtafDWEENERGVSYcFgKsvIndFLsRyefDLICRAHMVEDGYEFWnDR |
| 5Rgra_PPZ1       | NDLLWSDPsDtaldWEDNERGVSYcFgKtvIgtFLaRydfDLICRAHMVEDGYEFWcDR |
| 5Pgra_PPZ        | NDLLWSDPsDtaldWEDNERGVSYcFgKsvIaeFLaRydfDLICRAHMVEDGYEFWnER |
| 6Rdel_PPZ-A      | NDLLWSDPaDidgdWEDNERGVSYvFgKkvIneFLsKfdlDLVCRAHMVEDGYEFFgnR |
| 6Rdel_PPZ-B      | NDLvwSDPsDtavEWEDNERGVSYcFgKkvIneFLsKfdlDLVCRAHMVEDGYEFFgnR |
| Rdel_PPZ-C       | NDLLWSDPaDidgdWEDNERGVSYvFgKkvIneFLsKfdlDLVCRAHMVEDGYEFFgnR |
| 6Rdel_PPZ-D      | NDLLWSDPaDitanWEENERGVSYvFgKkvIndFLsKfdlDLVCRAHMVEDGYEFFgDR |
| 6Rdel_PPZ-E      | NDLLWSDPsDlssDwsENDRGVSYcFgRnnvneFLqRfdlDLICRAHMVEDGYEFFsDR |
| 6Rdel_PPZ-F      | NDLLWSDPsDlssDwsENDRGVSYcFgRnnvneFLqRfdlDLICRAHMVEDGYEFFsDR |
| 6Rdel_PPZ-G      | NDLLWSDPaDidgdWEDNERGVSYvFgKkvIneFLsKfdlDLVCRAHMVEDGYEFFgnR |
| 6Ccor_PPZ        | NDLLWSDPsDttaEWEDNERGVSYcFgKqiIseFLqKyefDLVCRAHMVEDGYEFFngR |
| 6Crev_PPZ        | NDLLWSDPsDtaaDWEENERGVSYcFgKsiIteFLrRmdfDLICRAHMVEDGYEFFhgR |
| 6Spun_PPZ        | NDLLWSDPsDlatDWEENERGVSYcFsKtivseFLsRhdlDLVCRAHMVEDGYEFFnnR |
| 6Gpro_PPZ        | NDLLWSDPsEtavEWEDsERGVSYcFgKqvqveFLqKndfDLVCRAHMVEDGYEFFgnR |
| 6AMAG_PPZ-A      | NDLLWSDPsEtaidWEDNERGVSYcFgasvIqqFLlKhdfDLVaRAHMVEDGYEFFgDR |
| 6AMAG_PPZ-B      | NDLLWSDPsEtaidWEDNERGVSYcFgasvIqqFLlKhdfDLVaRAHMVEDGYEFFgDR |
| 6Rallo_PPz1      | NDLLWSDPaDpnaEWEDNERGVSYlFgKsiIdqFLqKhdlDLICRAHtVEDGYEFFnDR |

| consensus PP1    | CDLLWsDPdkditGWseNDRGvSftFGpDvVsrFlqKhDmdLicRAHQvVEDGYeFf Kr   |
|------------------|----------------------------------------------------------------|
| consensus PPZ    | ndLLWsDP d dWedneRGVSy f k i fl k dLvcrAhmvVEdGYeFf dR         |
|                  | .....10.....20.....30.....40.....50.....60                     |
| 2YaLi_Glc7       | hLVTLFSAPNYCGEFDNAGA---MMSVDESLLCSFQILKPAEKkKqKfvys-gmg--ggrp  |
| 2Mgui_PP1        | QLVTLFSAPNYCGEFDNAGA---MMSVDESLLCSFQILKPADKKpRypa--n-nvgnnrp   |
| 2DEHA_Glc7       | QLVTLFSAPNYCGEFDNAGA---MMSVDESLLCSFQILKPADKKpRypqs-n-nisnnrp   |
| 2Mfar_PP1        | QLVTLFSAPNYCGEFDNAGA---MMSVDESLLCSFQILKPADKKpRypqa-n-nignnnrp  |
| 2Ct_Glc7         | QLVTLFSAPNYCGEFDNAGA---MMSVDESLLCSFQILKPADKKpRyapa-nvann--rp   |
| 2Cgla_Glc7       | QLVTLFSAPNYCGEFDNAGA---MMSVDESLLCSFQILKPAqKslprqqagr-----      |
| 2Ca_Glc7         | QLVTLFSAPNYCGEFDNAGA---MMSVDESLLCSFQILKPADKKpRyapa-nvann--rp   |
| 2Cdub_PP1        | QLVTLFSAPNYCGEFDNAGA---MMSVDESLLCSFQILKPADKKpRyapa-nvann--rp   |
| 2Klac_PP1        | QLVTLFSAPNYCGEFDNAGA---MMSVDESLLCSFQILKPAkKllernvvr-----       |
| 2Lther_Glc7      | QLVTLFSAPNYCGEFDNAGA---MMSVDESLLCSFQILKPAqKtlprpqgk-----       |
| 2Ag_PP1          | QLVTLFSAPNYCGEFDNAGA---MMSVDESLLCSFQILKPAvKpsagrqqpk-----      |
| 2Ecym_Glc7       | QLVTLFSAPNYCGEFDNAGA---MMSVDESLLCSFQILKPAvKpsagrqgpk-----      |
| 2Tbla_PP1        | QLVTLFSAPNYCGEFDNAGA---MMSVDESLLCSFQILKPAqKslprqqgk-----       |
| 2Tdel_PP1        | QLVTLFSAPNYCGEFDNAGA---MMSVDESLLCSFQILKPAqKslprqqggr-----      |
| 2Sc_Glc7         | QLVTLFSAPNYCGEFDNAGA---MMSVDESLLCSFQILKPAqKslprqqagr-----      |
| 1Tmel_Glc7       | QLVTLFSAPNYCGEFDNAGA---MMSVDESLLCSFQILKPAEKkKqKyvyg-gmgt--grp  |
| 1Bcin_PP1-A      | QLVTLFSAPNYCGEFDNAGA---MMSVDESLLCSFQILKPAEKkKqKyvtt-gglgassrp  |
| 1Nc_PP1          | QLVTLFSAPNYCGEFDNAGA---MMSVDESLLCSFQILKPAEKkKqKfgrr-----       |
| 1Mthe_PP1        | QLVTLFSAPNYCGEFDNAGA---MMSVDESLLCSFQILKPAEKkKqKfgrg-r-----     |
| 1Bbas_PP1        | QLVTLFSAPNYCGEFDNAGA---MMSVDESLLCSFQILKPAEKkKqKfgr-----        |
| 1Anam_PP1        | QLVTLFSAPNYCGEFDNAGA---MMSVDESLLCSFQILKPAEKkKqnrfg-r-----      |
| 1Npar_PP1        | QLVTLFSAPNYCGEFDNAGA---MMSVDESLLCSFQILKPAEKkKqKyvsm-gs----akp  |
| 1Bory_Glc7       | QLVTLFSAPNYCGEFDNAGA---MMSVDESLLCSFQILKPAEKkKqKyvpn-lgrpasg--  |
| 1Uree_PP1        | QLVTLFSAPNYCGEFDNAGA---MMSVDESLLCSFQILKPAEKkKqKyvyg-gmst--grp  |
| 1Tver_PP1        | QLVTLFSAPNYCGEFDNAGA---MMSVDESLLCSFQILKPAEKkKqKyvyg-gmap--nnrp |
| 1Anid_Glc7       | QLVTLFSAPNYCGEFDNAGA---MMSVDESLLCSFQILKPAEKkKqKyvyg-amss--grp  |
| 1Aory_Glc7       | kLVTLFSAPNYCGEFDNAGA---MMSVDESLLCSFQILKPAEKkKkanitr-gfksdrsnp  |
| 1Af_PP1          | QLVTLFSAPNYCGEFDNAGA---MMSVDESLLCSFQILKPAEKkKqKyvyg-gmss--gap  |
| 3Sp_PP1-1        | QLVTLFSAPNYCGEFDNAGA---MMSVDESLLCSFQILKPAEKkKqRyg-y-qgssqn-wh  |
| 3Sp_PP1-2        | QLVTLFSAPNYCGEFDNvGA---MMSVNEdLLCSFQILKPAEKkKqRvsqssikesks---  |
| 3Sj_PP1          | QLVTLFSAPNYCGEFDNAGA---MMSVDESLLCSFQILKPAEKkKqRygh-----        |
| 3Sj_Sds21        | hLVTLFSAPNYCGEFDNvGA---MMSVNDnLLCSFQILKPAEKkKqRnsqvlaheaar---  |
| 3Scot_PP1        | QLVTLFSAPNYCGEFDNAGA---MMSVDESLLCSFQILKPAEKkKqRyggg-yqgmgn-wh  |
| 3Scot_Sds21      | lLVTLFSAPNYCGEFDNvGA---MMSVNEdLLCSFQILKPAEKkKqRnhplagkepkp---  |
| 3Scry_PP1        | QLVTLFSAPNYCGEFDNAGA---MMSVDESLLCSFQILKPAEKkKqRyggg-yqgmgn-wh  |
| 3Scry_Sds21      | lLVTLFSAPNYCGEFDNvGA---MMSVNEdLLCSFQILKPAEKkKqRnhplsgkepkp---  |
| 3Plac_PP1        | QLVTLFSAPNYCGEFDNAGA---MMSVDESLLCSFQILKPAEKkKqKyqyg-gmgs--grp  |
| 3Pjir_PP1        | QLVTLFSAPNYCGEFDNAGA---MMSVDESLLCSFQILKPAEKkKqKylyg-gmgs--grp  |
| 3Nirr_PP1        | QLVTLFSAPNYCGEFDNAGA---MMSVDESLLCSFQILKPAEKkKqKyvyg-gmgt--grp  |
| 4GALMADRAFT_Glc7 | hLVTLFSAPNYCGEFDNAGA---MMSVDETLCSFQILKPAEKkKaKyp-y--ggmnmgrp   |
| 4PILCRDRAFT_Glc7 | hLVTLFSAPNYCGEFDNAGA---MMSVDETLCSFQILKPAEKkKaKyp-y--ggmnmgrp   |
| 4Shir_Glc7       | QLVTLFSAPNYCGEFDNAGA---MMSVDETLCSFQILKPAEKkKaKyp-y--ggmnmgrp   |
| 4Sver_PP1        | QLVTLFSAPNYCGEFDNAGA---MMSVDETLCSFQILKPAEKkKaKya-y--namggk-n   |
| 4Pgig_PP1        | hLVTLFSAPNYCGEFDNAGA---MMSVDETLCSFQILKPAEKkKpRlp-y--gsgntgrp   |
| 4Bbot_PP1        | QLVTLFSAPNYCGEFDNAGA---MMSVDETLCSFQILKPAEKkKyp-y--ggmnmgrp     |
| 4Cvis_PP1-A      | QLVTLFSAPNYCGEFDNAGA---MMSVDETLCSFQILKPAEKkKsKypgyggtmggnrp    |
| 4Cvis_PP1-B      | QLVTLFSAPNYCGEFDNAGA---MMSVDESLLCSFQILKPAEKkKpsklttmkkkkgktrf  |
| 4Cgat_PP1        | QLVTLFSAPNYCGEFDNAGA---MMSVDETLCSFQILKPAEKkKpKygygyggs---arp   |
| 4Cneo_PP1        | QLVTLFSAPNYCGEFDNAGA---MMSVDDTLCSFQILKPAEKkKpKygygyggs---arp   |
| 4Tmes_PP1        | QLVTLFSAPNYCGEFDNAGA---MMSVDDTLCSFQILKPAEKkKtnrnpygap---grr    |
| 4Umay_Glc7       | QLVTLFSAPNYCGEFDNAGA---MMSVDETLCSFQILKPAEKkKqKya-y--gginmgrp   |
| 4Phub_PP1        | QLVTLFSAPNYCGEFDNAGA---MMSVDETLCSFQILKPAEKkKqKya-y--gginmgrp   |
| 5Wich_Glc7       | QLVTLFSAPNYCGEFDNAGA---MMSVDETLCSFQILKPAEKkKqKfpas---ygigrp    |
| 5Rgra_PP1        | QLVTLFSAPNYCGEFDNAGA---MMSVDETLCSFQILKPAEKkKktfa-y--ggagqgrp   |
| 5Pgra_PP1        | QLVTLFSAPNYCGEFDNAGA---MMSVDETLCSFQILKPAEKkKqKfm-y--ggmntgrp   |
| 6Rdel_PP1        | QLVTLFSAPNYCGEFDNAGA---MMSVDDSLMCSFQILKPAEKkKsKytgytgsknasrgk  |
| 6Ccor_PP1        | QLVTLFSAPNYCGEFDNAGA---MMSVDDTLCSFQILKPAEKkKqKfayg---gintgkp   |
| 6Crev_PP1        | kLVTLFSAPNYCGEFDNAGA---MMSVDDTLCSFQILKPAEKkKpRggrrr-----       |
| 6Spun_PP1        | QLVTLFSAPNYCGEFDNAGA---MMSVDETLCSFQILKPAEKkKtKyayg---gmnsgrp   |
| 6Gpro_PP1-A      | QLVTLFSAPNYCGEFDNAGA---MMSVDETLCSFQILKPAEKkKqKyayg---gissgrp   |
| 6Gpro_PP1-B      | QLVTLFSAPNYCGEFDNAGA---MMSVDESLMCSFQILKPAEKkKqKyvyggpggssgrg   |
| 6AMAG_PP1-A      | QLVTLFSAPNYCGEFDNAGA---MMSVDETLCSFQILKPAEKkKqKhnygagnrskfa--   |
| 6Rallo_PP1       | QLVTLFSAPNYCGEFDNAGA---MMSVDETLCSFQILKPAEKkKqKyayg---gmntgrp   |

```

.....:....10.....:....20.....:....30.....:....40.....:....50.....:....60
2YALI_Ppz1      sLVTVFSAPNYCGEFDNWGA---VMSVseELLCsFELLkPLDsaaLKqeMkKg----kh
2Mgui_Ppz1      tLVTVFSAPNYCGEFDNWGA---VMSVsdELLCsFELLdPLDsvaLKqvMkKg----rq
2DEHA_Ppz1      tLVTVFSAPNYCGEFDNWGA---VMSVsdELLCsFELLdPLDsiaLKqvMkKg----ke
2Mfar_Ppz       tLVTVFSAPNYCGEFDNWGA---VMSVseELLCsFELLdPLDssaLKqvMkKg----ri
2Ct_Ppz1        tLVTVFSAPNYCGEFDNWGA---VMgVseDLLCsFELLdPLDsvaLKqvMkKg----kq
2Cgla_Ppz1      tLVTVFSAPNYCGEFDNWGA---VMSVsqELLCsFELLdPLDsnsLKqvMkKg----kq
2Cgla_Ppz2      sLVTVFSAPNYCGEFDNWGA---VMSVsegLMCsFELLdPLDsaaLKqvMkKg----rq
2Ca_Ppz1        tLVTVFSAPNYCGEFDNWGA---VMgVseDLLCsFELLdPLDsaaLKqvMkKg----kq
2Cdub_Ppz       tLVTVFSAPNYCGEFDNWGA---VMgVseDLLCsFELLdPLDstaLKqvMkKg----kq
2Klac_PpzA      sLVTVFSAPNYCGEFDNWGA---VMSVsegLLCsFELLEPLDstaLKqvMkKg----rq
2Klac_PpzB      sLVTVFSAPNYCGEFDNWGA---VMSVsegLLCsFELLEPLDstaLKqvMkKg----rq
2Lther_Ppz1     sLVTVFSAPNYCGEFDNWGA---VMSVsegLLCsFELLdPLDsaaLKqvMkKg----rq
2Ag_Ppz         sLVTVFSAPNYCGEFDNWGA---VMSVsegLLCsFELLdPLDsaaLKqvMkKg----rq
2Ecym_Ppz       sLVTVFSAPNYCGEFDNWGA---VMSVsegLLCsFELLdPLDsaaLKqvMkKg----rq
2Tbla_PpzA      sLVTVFSAPNYCGEFDNWGA---VMSVsegLLCsFELLdPLDsaaLKqvMkKg----rq
2Tdel_PPzA      sLVTVFSAPNYCGEFDNWGA---VMSVsegLLCsFELLdPLDgaaLKqvMkKg----rq
2Sc_PPZ1        sLVTVFSAPNYCGEFDNWGA---VMSVsegLLCsFELLdPLDsaaLKqvMkKg----rq
2Sc_PPZ2        sLVTVFSAPNYCGEFDNWGA---VMTVsegLLCsFELLdPLDstaLKqvMkKg----rq
1Tmel_Ppz1      tLVTVFSAPNYCGEFDNWGA---VMSVsgELLCsFELLkPLDsaaLKqqMkKg----rg
1Bcin_Ppz       vLVTVFSAPNYCGEFDNYGA---VMSVstELLCsFELLkPLDssaLKsqMkKs----rn
1Nc_PP-Z        iLVTiFSAPNYCGEFDNWGA---VMaVstELLCsFELLkPLDsaaLKthIkKg----rh
1Mthe_Ppz       vLVTVFSAPNYCGEFDNWGA---VMSVsaELLCsFELLkPLDsaLKshIkKg----rn
1Bbas_Ppz       vLVTVFSAPNYCGEFDNWGA---VMSVnaELLCsFELLkPLDssaLKshIkKg----rn
1Anam_Ppz       vLVTVFSAPNYCGEFDNWGA---VMSVsgELLCsFELLkPLDssaLKrhIkKg----rn
1Npar_Ppz1      iLVTVFSAPNYCGEFDNWGA---VMSVssELLCsFELLkPLDssaLKshIkKg----rn
1Bory_Ppz1      vLVTVFSAPNYCGEFDNWGA---VMSVsgELLCsFELLkPLDssaLKshIkKs----rn
1Uree_Ppz       iLVTVFSAPNYCGEFDNWGA---IMSVsaELLCsFELLkPLDssaLKshIkKg----rn
1Tver_Ppz       iLVTVFSAPNYCGaFDNWGA---IMSVsdELLCsFELLkPLDssaLKnhIkKg----rn
1Anid_Ppz1      iLVTVFSAPNYCGEFDNWGA---VMSVsgELLCsFELLkPLDsaaLKshIkKg----rk
1Aory_Ppz1      iLVTVFSAPNYCGEFDNWGA---IMSVsdELLCsFELLkPLDstaLKnhIkKg----rn
1Af_PPZ         iLVTVFSAPNYCGEFDNWGA---IMSVsgELLCsFELLkPLDstaLKnhIkKg----rk
3Sp_PPZ         tLcTVFSAPNYCGEFDNWGA---VMSVnsELLCsFELIkPLDqaaIRreLkKs----kr
3Sj_Pzh1        tLcTVFSAPNYCGEFDNWGA---VMSVnpELLCsFELLkPLDqaaIRreLkKs----kl
3Soc_PPz        tLcTVFSAPNYCGEFDNWGA---VMSVnsELLCsFELIkPLDqaaIRreLkKs----kh
3Scry_PPz       tLcTVFSAPNYCGEFDNWGA---VMSVnsELLCsFELIkPLDqaaIRreLkKs----kr
3Plac_PPz       tLVTVFSAPNYCGEFDNFgmytvMcVseELLCsFELLkPLDasaLKqhMkKg----ds
3Pjir_PPz-A     tLVTVFSAPNYCGEFDNFgmytvMcVseELLCsFELLkPLDasaLKqhMkKg----ds
3Nirr_PP-Z      tLVTVFSAPNYCGEFDNFGA---VMSVseELLCsFELLkPLDqiaLKqeMkKr----rr
4GALMADRAFT_PPz1 tLVTVFSAPNYCGEFDNYGA---cMSVseDLLCaFELLkPLDgaaLRkeMtKa----kr
4PILCRDRAFT_PPz1 tLVTVFSAPNYCGEFDNYGA---cMSVseDLLCaFELLkPLDgpaLRkeMtKa----kr
4Shir_PPz       tLVTVFSAPNYCGEFDNYGA---cMSVseDLLCaFELLkPLDgpaLRkeMtKa----kr
4Sver_PPZ       tLVTVFSAPNYCGEFDNYGA---cMSVseDLLCaFELLkPLDpavIKkeLsKa----kr
4Pgig_PPZ       tLVTVFSAPNYCGEFDNYGA---cMSVseELLCaFELLkPLDgpaLRkeMtKa----kr
4Bbot_PPZ       tLVTVFSAPNYCGEFDNYGA---cMSVseDLLCaFELLkPLDgpaLRkeMtKa----rr
4Cvis_PPZ       tLVTVFSAPNYCGEFDNYGA---cMSVseDLLCaFELLkPLDgpaLRkeMtKa----kr
4Cgat_PPZ       tLVTVFSAPNYCGEFDNFGA---VMSVseDLLCsFELLkPLDgaaLKkeMtKs----kr
4Cneo_PPZ       tLVTVFSAPNYCGEFDNFGA---VMSVseDLLCsFELLkPLDgaaLKkeMtKs----kr
4Tmes_PPZ       tLVTVFSAPNYCGEFDNFGA---VMSVseDLLCsFELLkPLDgaaLKkeMaKn----kr
4Umay_PPZ       tLVTiFSAPNYCGEFDNFGA---VMSVseDLLCaFELLkPLDgaaLKkeMaKn----kr
4Phub_PPZ       tLVTiFSAPNYCGEFDNFGA---VMSVseDLLCaFELLkPLDgaaLKkeMhKs----rk
5Wich_PP-Z      tLVTiFSAPNYCGEFDNFGA---IMSVsqDLLCaFELLkPLDsqaLKkeMhKs----rk
5Rgra_PPZ1      aLVTiFSAPNYCGEFDNFGA---VMSVslDLLCsFELLkPLDtaqLKreLaKt----rr
5Pgra_PPZ       tLVTiFSAPNYCGgtssmon---okaryo-tICfuNgI-----
6Rdel_PPZ-A     sLVTVFSAPNYCGEFDNFGA---IMSVneELLCsFELLtPaDhplaKerLkqnkansnn-
6Rdel_PPZ-B     tLVTVFSAPNYCGEFDNFGA---IMSVneELLCsFELLtPLEhpstaklqeaqrn-rgr-
Rdel_PPZ-C      tLVTVFSAPNYCGEFDNFGA---IMSVneELLCsFELLtPaDhplaKerLkqnkinnk-
6Rdel_PPZ-D     tLVTiFSAPNYCGEFDNFaA---IMSVneELLCsFELLtPMdhpltvksr-----
6Rdel_PPZ-E     sLVTiFSAPNYCGEFDNYGA---VMTiskDLLCsFELLpPaEtvisHeknlKksssslql
6Rdel_PPZ-F     sLVTVFSAPNYCGEFDNYGA---VMTiskDLLCsFEMlpPIqavtpqqqenK-----
6Rdel_PPZ-G     sLVTVFSAPNYCGEFDNFGA---IMSVneELLCsFELLtPaDhplaKerLkqnkansnn-
6Ccor_PPZ       tLVTVFSAPNYCGEFDNYGA---VMSVneELLCsFELLkPqDlsapqrrkrns----pp
6Crev_PPZ       qLVTVFSAPNYCGEFDNsGA---VMnVneELLCsFEILkPLvenlhtcmsrveasfwsrr
6Spun_PPZ       tLVTVFSAPNYCGEFDNkGA---VMcVneDLLCsFEILqPqthpkhslkgrRr-----
6Gpro_PPZ       iLVTVFSAPNYCGEFDNnGA---VMSVneELLCsFEILtPvtvtkkHnmrrRr-----
6AMAG_PPZ-A     sLVTiFSAPNYCGEFNNlGA---VMcVneDLMCTFEILkPegsvrIvngrRrRis-----
6AMAG_PPZ-B     sLVTiFSAPNYCGEFNNlGA---VMcVneDLMCTFEILkPegsvrIvngrRrRis-----
6Rallo_PPz1     tLVTVFSAPNYCGEFENcGA---ILqVsqnLLCsFQIIknssplykissedink-----

```

|               |                      |                       |        |
|---------------|----------------------|-----------------------|--------|
| Consensus PP1 | qLVTlFSAPNYCGEFDNaGA | mMSVdesLlCSFQILKPAeKk | k      |
| consensus PPZ | LvTvFSAPNYCGefdnwga  | vmsv ellCsfell pld    | lk m k |

Boxshade Preferences ? X

General RTF/PS/PNG Text (ASCII) output Similarities Groups

Different from consensus Identical to consensus Other prefs

Foreground Background

☐ Uppercase **acgt**

☒ Lowercase

Foreground Background

☒ Uppercase **ACGT**

☐ Lowercase

Font size: 10

☒ Portrait

☐ Landscape

Similar to consensus All the same residue

Foreground Background

☒ Uppercase **ACGT**

☐ Lowercase

Foreground Background

☒ Uppercase **ACGT**

☐ Lowercase

OK Cancel

Boxshade Preferences ? X

General RTF/PS/PNG Text (ASCII) output Similarities Groups

☐ Consensus to a single sequence Threshold Fraction (0-1): 0.80

Make consensus to sequence: 1

☒ Special shading for similar residues

☒ Print sequence names

☒ Special shading for completely conserved residues

Print sequence numbers:

☐ at left end ☐ at right end

☒ Print ruler line

☐ Default numbering (start at 1)

☒ Print consensus line

Symbols for consensus: LU

Sequence characters per line: 60

Number of lines between blocks: 1

☒ Protein ☐ DNA/RNA

| Seq. No. | Start number |
|----------|--------------|
| 1        | 1            |
| 2        | 1            |
| 3        | 1            |
| 4        | 1            |
| 5        | 1            |

OK Cancel
