# Supplementary material for: Comparative Analysis of Type 1 and Type Z Protein Phosphatases Reveals D615 as a Key Residue for Ppz1 Regulation
Source: MDPI journal article supplement (doi:10.3390/ijms23031327), 2022-01-25
Supplement: s1 [file s1]

Figure S2. Conservation and divergence of structural features required for modulation by regulatory subunits

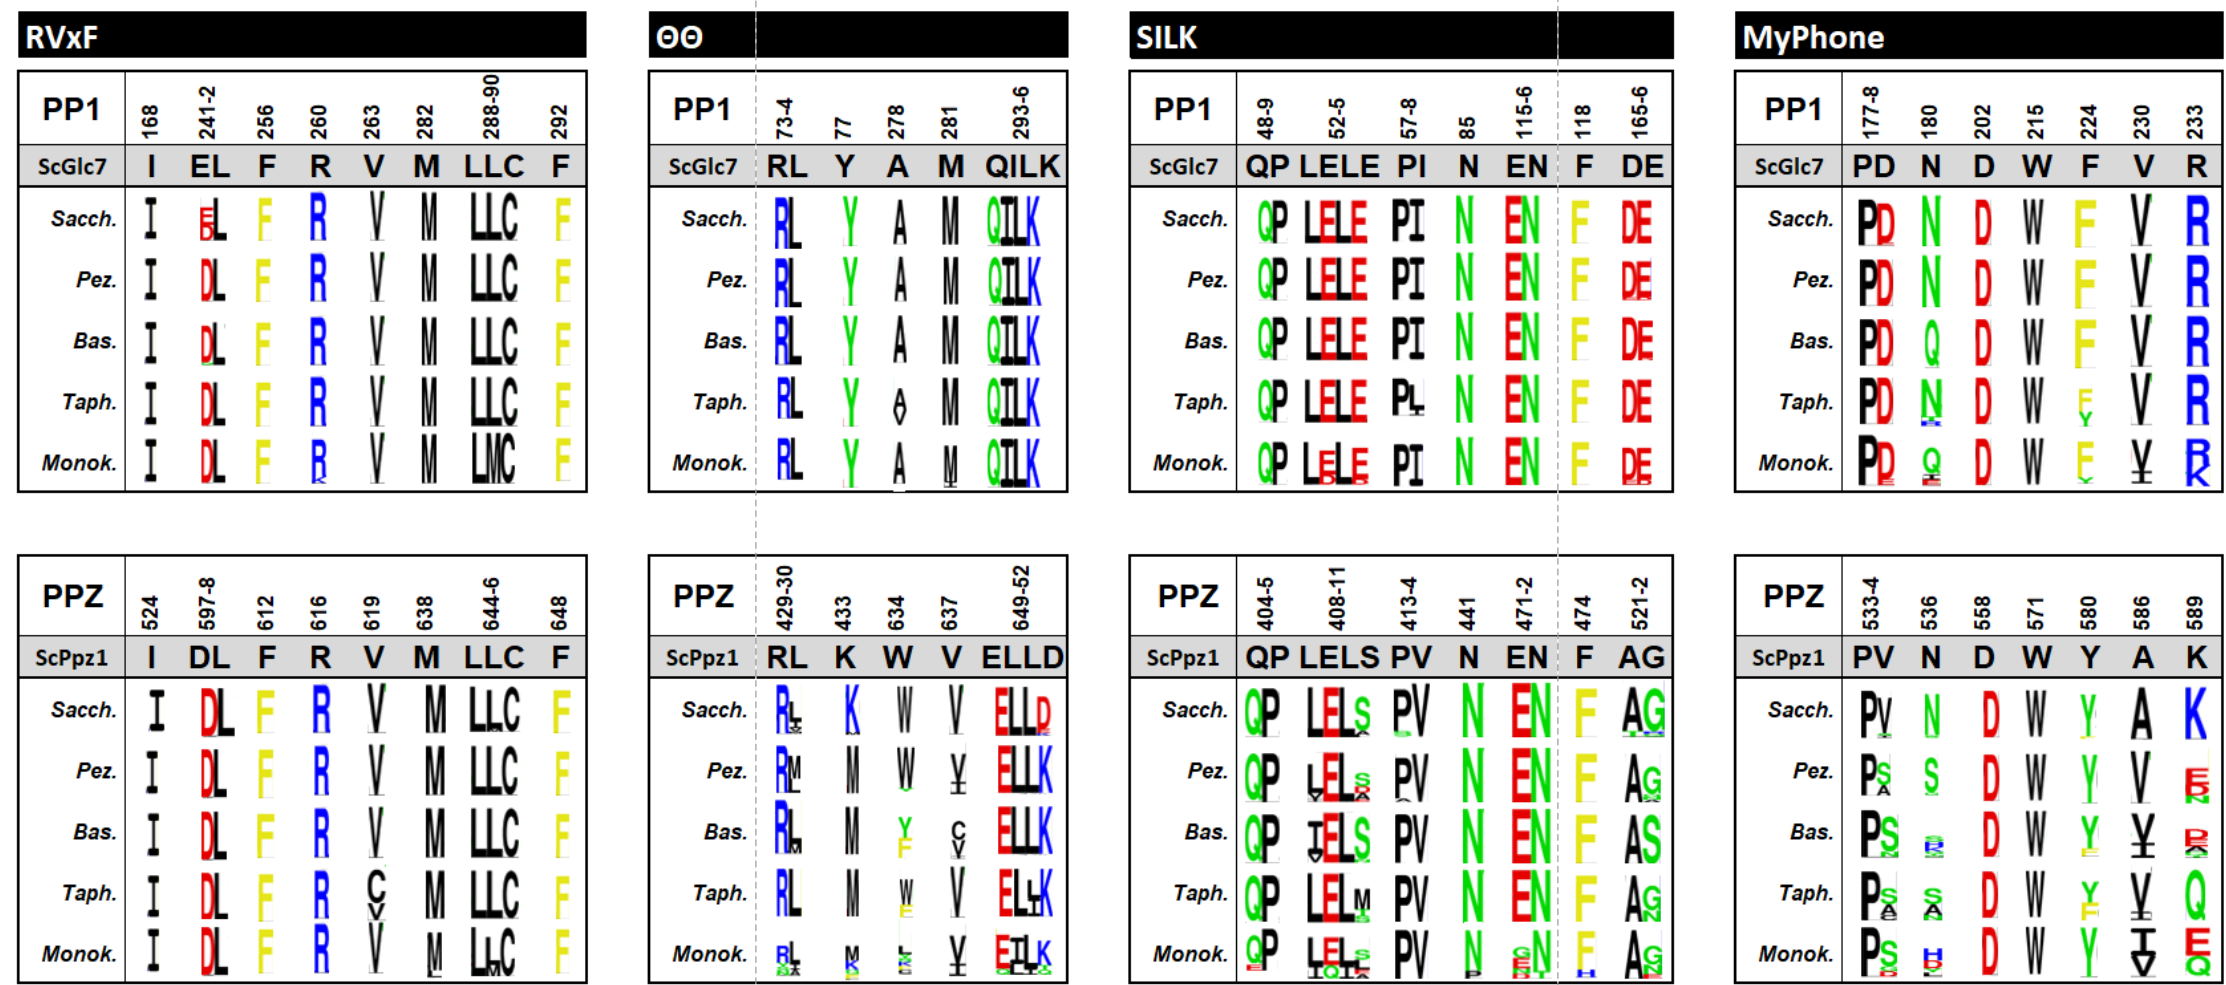

Figure S2. (cont.)

| NIPP-1 |    |     |     |     |     |       |       |         |       |     |  |  |
|--------|----|-----|-----|-----|-----|-------|-------|---------|-------|-----|--|--|
| PP1    | 42 | 149 | 153 | 156 | 178 | 180-1 | 183-4 | 187-93  | 195-8 | 200 |  |  |
| ScGlc7 | R  | K   | D   | N   | D   | NS    | EQ    | RVMRPTD | PDVG  | L   |  |  |
| Sacch. | R  | K   | D   | N   | D   | NS    | EQ    | RVMRPTD | PDVG  | L   |  |  |
| Pez.   | R  | K   | D   | N   | D   | NS    | EQ    | RVMRPTD | PDCG  | L   |  |  |
| Bas.   | R  | K   | D   | N   | D   | QS    | EQ    | RVMRPTD | PDTG  | L   |  |  |
| Taph.  | R  | K   | D   | N   | D   | NS    | EQ    | RVMRPTD | PDTG  | L   |  |  |
| Monok. | R  | K   | D   | N   | D   | QS    | EQ    | RVMRPTD | PDTG  | L   |  |  |

| PPZ    | 398 | 505 | 509 | 512 | 534 | 536-7 | 539-40 | 543-9   | 551-4 | 556 |  |  |
|--------|-----|-----|-----|-----|-----|-------|--------|---------|-------|-----|--|--|
| ScPpz1 | R   | K   | D   | N   | V   | NS    | DE     | HVVRPTD | PDFG  | I   |  |  |
| Sacch. | R   | K   | D   | N   | V   | NS    | DE     | HVVRPTD | PDEG  | I   |  |  |
| Pez.   | R   | K   | D   | N   | S   | SH    | DD     | LVVRPTD | PDYG  | L   |  |  |
| Bas.   | R   | K   | D   | N   | S   | SS    | DD     | LVVRPTD | PDYG  | L   |  |  |
| Taph.  | R   | K   | D   | N   | S   | SS    | DD     | LVVRPTD | PDYG  | L   |  |  |
| Monok. | R   | K   | D   | N   | S   | SS    | DD     | LVVRPTD | PDYG  | L   |  |  |

| Inh-2  |    |    |       |       |       |     |       |     |        |     |        |     |
|--------|----|----|-------|-------|-------|-----|-------|-----|--------|-----|--------|-----|
| PP1    | 63 | 95 | 123-4 | 127-9 | 131-3 | 148 | 193-6 | 205 | 219-20 | 222 | 247-51 | 266 |
| ScGlc7 | D  | R  | NH    | ASI   | RIY   | W   | DIPD  | W   | DR     | V   | HQVVE  | F   |
| Sacch. | D  | R  | NH    | ASI   | RIY   | W   | DIPD  | W   | DR     | V   | HQVVE  | F   |
| Pez.   | D  | R  | NH    | ASI   | RIY   | W   | DIPD  | W   | DR     | V   | HQVVE  | F   |
| Bas.   | D  | R  | NH    | ASI   | RIY   | W   | DVPD  | W   | DR     | V   | HQVVE  | F   |
| Taph.  | D  | R  | NH    | ASI   | RIY   | W   | DVPD  | W   | DR     | V   | HQVVE  | F   |
| Monok. | D  | R  | NH    | ASI   | RIY   | W   | DVPD  | W   | DR     | V   | HQVVE  | F   |

| PPZ    | 419 | 451 | 479-80 | 483-5 | 487-9 | 504 | 549-52 | 561 | 575-6 | 578 | 603-7 | 622 |
|--------|-----|-----|--------|-------|-------|-----|--------|-----|-------|-----|-------|-----|
| ScPpz1 | D   | R   | NH     | ANV   | RVY   | W   | DVPD   | W   | ER    | V   | HMVVE | F   |
| Sacch. | D   | R   | NH     | ANV   | RVY   | W   | DVPD   | W   | ER    | V   | HMVVE | F   |
| Pez.   | D   | R   | NH     | ANV   | RVY   | W   | DVPD   | W   | ER    | V   | HMVVE | F   |
| Bas.   | D   | R   | NH     | ANV   | RVY   | W   | DVPD   | W   | ER    | V   | HMVVE | F   |
| Taph.  | D   | R   | NH     | ANV   | RVY   | W   | DVPD   | W   | ER    | V   | HMVVE | F   |
| Monok. | D   | R   | NH     | ANV   | RVY   | W   | DVPD   | W   | ER    | V   | HMVVE | F   |

Figure S2. (cont.)

| Sds22  |      |    |    |      |    |      |        |     |     |       |       |     |     |     |     |     |     |     |
|--------|------|----|----|------|----|------|--------|-----|-----|-------|-------|-----|-----|-----|-----|-----|-----|-----|
| PP1    | 22-4 | 35 | 39 | 42-3 | 70 | 95-7 | 129-30 | 133 | 136 | 140-1 | 145-6 | 149 | 153 | 191 | 193 | 270 | 274 | 276 |
| ScGlc7 | KPG  | R  | S  | RS   | D  | RGK  | IN     | Y   | Y   | KR    | IK    | K   | D   | P   | D   | N   | E   | D   |
| Sacch. | KPG  | R  | S  | RS   | D  | RGK  | IN     | Y   | Y   | KR    | IK    | K   | D   | P   | D   | N   | E   | D   |
| Pez.   | RPG  | R  | T  | RE   | D  | RGK  | IN     | Y   | Y   | KR    | IK    | K   | D   | P   | D   | N   | E   | D   |
| Bas.   | RPG  | K  | T  | RE   | D  | RGK  | IN     | Y   | Y   | KR    | IK    | K   | D   | P   | D   | N   | E   | D   |
| Taph.  | RPG  | R  | N  | RE   | D  | RGK  | IN     | Y   | Y   | KR    | IK    | K   | D   | P   | D   | N   | E   | D   |
| Monok. | RPG  | R  | T  | RE   | D  | RGK  | IN     | Y   | Y   | KR    | IK    | K   | D   | P   | D   | N   | E   | D   |

| PPZ    | 378-80 | 391 | 395 | 398-9 | 426 | 451-3 | 485-6 | 489 | 492 | 496-7 | 501-2 | 505 | 509 | 547 | 549 | 626 | 630 | 632 |
|--------|--------|-----|-----|-------|-----|-------|-------|-----|-----|-------|-------|-----|-----|-----|-----|-----|-----|-----|
| ScPpz1 | KRT    | L   | I   | RE    | D   | RGK   | VT    | Y   | Y   | KR    | IK    | K   | D   | P   | D   | N   | E   | D   |
| Sacch. | KRT    | A   | I   | RE    | D   | RGK   | VT    | Y   | Y   | KR    | IK    | K   | D   | P   | D   | N   | E   | D   |
| Pez.   | KVT    | K   | I   | RE    | D   | RGK   | VT    | Y   | Y   | KR    | IK    | K   | D   | P   | D   | N   | E   | D   |
| Bas.   | KVS    | T   | Q   | RE    | D   | RGK   | VT    | Y   | Y   | KR    | IK    | K   | D   | P   | D   | N   | E   | D   |
| Taph.  | KSS    | V   | M   | RE    | D   | RGK   | T     | Y   | Y   | KR    | IK    | K   | D   | P   | D   | N   | E   | D   |
| Monok. | KVS    | L   | H   | RE    | D   | RGK   | V     | Y   | Y   | KR    | IK    | K   | D   | P   | D   | N   | E   | D   |
